# Supplementary material for: Chemical Characterization, α-Glucosidase, α-Amylase and Lipase Inhibitory Properties of the Australian Honey Bee Propolis
Source: MDPI journal article supplement (doi:10.3390/foods11131964), 2022-07-01

# **Chemical characterisation, $\alpha$ -glucosidase, $\alpha$ -amylase and lipase inhibitory properties of the Australian honey bee propolis**

Sabah Uddin<sup>1</sup>, Peter R. Brooks<sup>1,2</sup>, and Trong D. Tran<sup>1,2,\*</sup>

<sup>1</sup> School of Science, Technology and Engineering, University of the Sunshine Coast, Maroochydore DC, Queensland 4558, Australia; [ttran1@usc.edu.au](mailto:ttran1@usc.edu.au)

<sup>2</sup> Centre for Bioinnovation, University of the Sunshine Coast, Maroochydore DC, Queensland 4558, Australia.

\* Correspondence: [ttran1@usc.edu.au](mailto:ttran1@usc.edu.au); Tel: +61 7 5459 4579

## **Supplementary Materials**

**Figure S1.** <sup>1</sup>H Spectrum of **1** in MeOH-*d*<sub>4</sub>

**Figure S2.** <sup>13</sup>C Spectrum of **1** in MeOH-*d*<sub>4</sub>

**Figure S3.** HSQC Spectrum of **1** in MeOH-*d*<sub>4</sub>

**Figure S4.** gCOSY Spectrum of **1** in MeOH-*d*<sub>4</sub>

**Figure S5.** HMBC Spectrum of **1** in MeOH-*d*<sub>4</sub>

**Figure S6.** <sup>1</sup>H Spectrum of **2** in MeOH-*d*<sub>4</sub>

**Figure S7.** <sup>13</sup>C Spectrum of **2** in MeOH-*d*<sub>4</sub>

**Figure S8.** HSQC Spectrum of **2** in MeOH-*d*<sub>4</sub>

**Figure S9.** gCOSY Spectrum of **2** in MeOH-*d*<sub>4</sub>

**Figure S10.** HMBC Spectrum of **2** in MeOH-*d*<sub>4</sub>

**Figure S11.** <sup>1</sup>H Spectrum of **3** in MeOH-*d*<sub>4</sub>

**Figure S12.** <sup>13</sup>C Spectrum of **3** in MeOH-*d*<sub>4</sub>

**Figure S13.** HSQC Spectrum of **3** in MeOH-*d*<sub>4</sub>

**Figure S14.** gCOSY Spectrum of **3** in MeOH-*d*<sub>4</sub>

**Figure S15.** HMBC Spectrum of **3** in MeOH-*d*<sub>4</sub>

**Figure S16.**  $^1\text{H}$  Spectrum of **4** in  $\text{MeOH-}d_4$

**Figure S17.**  $^{13}\text{C}$  Spectrum of **4** in  $\text{MeOH-}d_4$

**Figure S18.** HSQC Spectrum of **4** in  $\text{MeOH-}d_4$

**Figure S19.** gCOSY Spectrum of **4** in  $\text{MeOH-}d_4$

**Figure S20.** HMBC Spectrum of **4** in  $\text{MeOH-}d_4$

**Figure S21.**  $^1\text{H}$  Spectrum of **5** in  $\text{CHCl}_3-d$

**Figure S22.**  $^{13}\text{C}$  Spectrum of **5** in  $\text{CHCl}_3-d$

**Figure S23.** HSQC Spectrum of **5** in  $\text{CHCl}_3-d$

**Figure S24.** gCOSY Spectrum of **5** in  $\text{CHCl}_3-d$

**Figure S25.** HMBC Spectrum of **5** in  $\text{CHCl}_3-d$

**Figure S26.**  $^1\text{H}$  Spectrum of **6** in  $\text{MeOH-}d_4$

**Figure S27.**  $^{13}\text{C}$  Spectrum of **6** in  $\text{MeOH-}d_4$

**Figure S28.** HSQC Spectrum of **6** in  $\text{MeOH-}d_4$

**Figure S29.** gCOSY Spectrum of **6** in  $\text{MeOH-}d_4$

**Figure S30.** HMBC Spectrum of **6** in  $\text{MeOH-}d_4$

**Figure S31.** Two-dimensional diagrams showing non-covalent interactions of **1-9** and acarbose (**10**) with  $\alpha$ -glucosidase (2ZQ0)

**Figure S32.** Two-dimensional diagrams showing non-covalent interactions of **1-9** and acarbose (**10**) with  $\alpha$ -amylase (2QV4)

**Figure S33.** Two-dimensional diagrams showing non-covalent interactions of **1-9** and orlistat (**11**) with lipase (6KSM)

**Figure S1.**  $^1\text{H}$  Spectrum of **1** in  $\text{MeOH-}d_4$ .

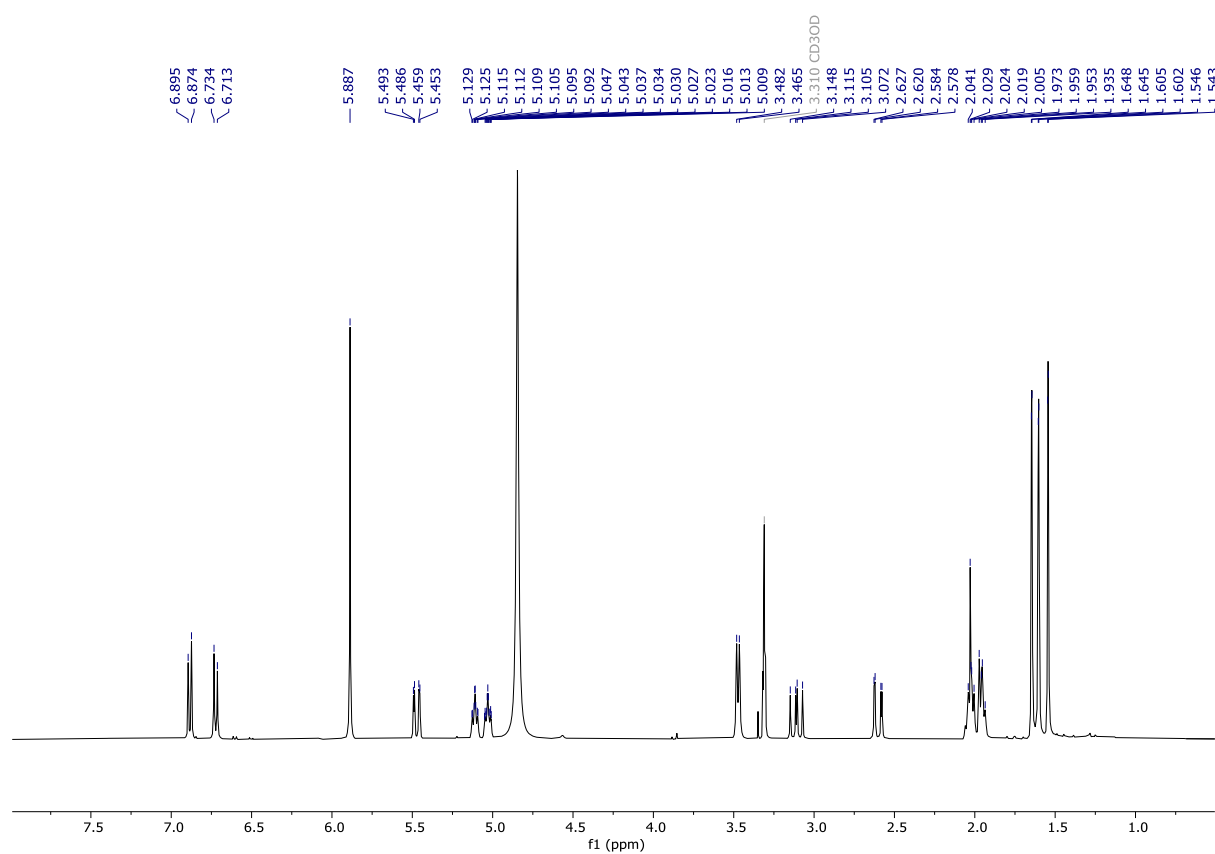

**Figure S2.**  $^{13}\text{C}$  Spectrum of **1** in  $\text{MeOH-}d_4$ .

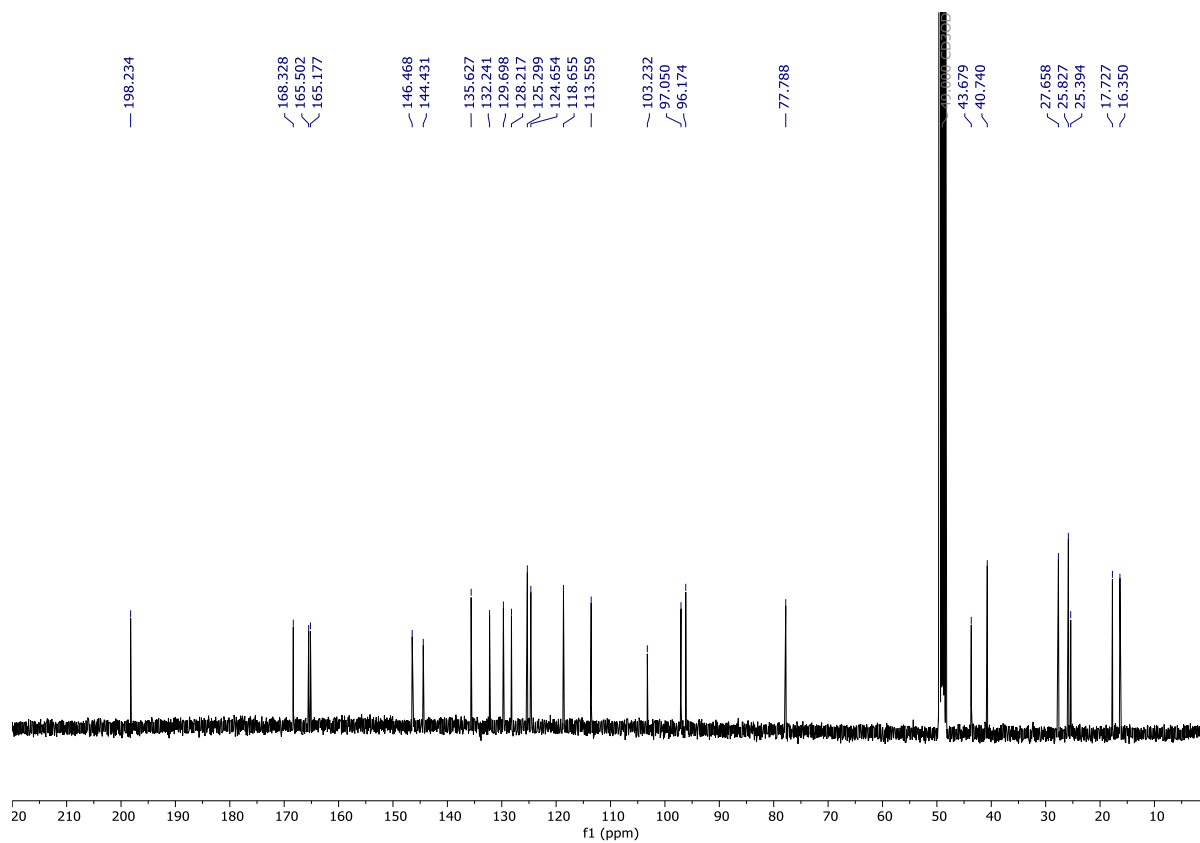

**Figure S3.** HSQC Spectrum of **1** in MeOH-*d*<sub>4</sub>.

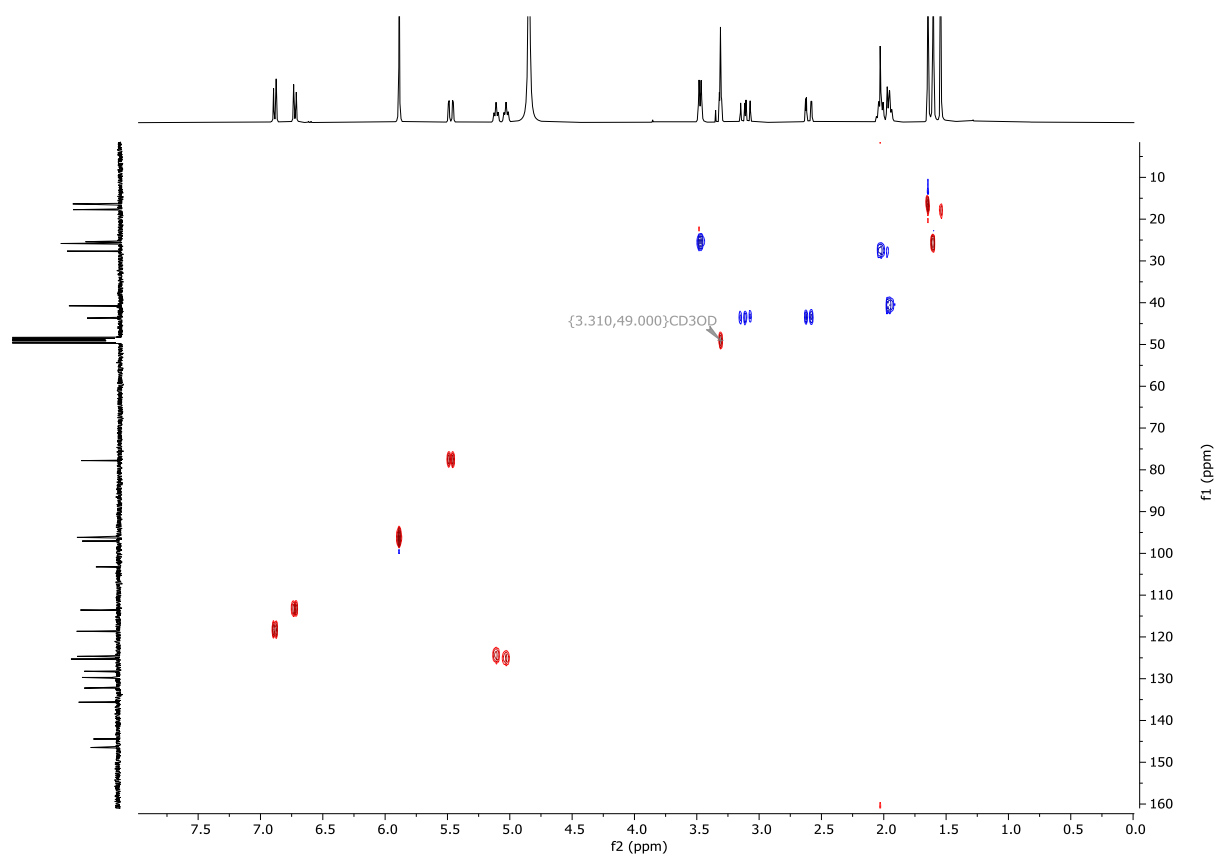

**Figure S4.** gCOSY Spectrum of **1** in MeOH-*d*<sub>4</sub>.

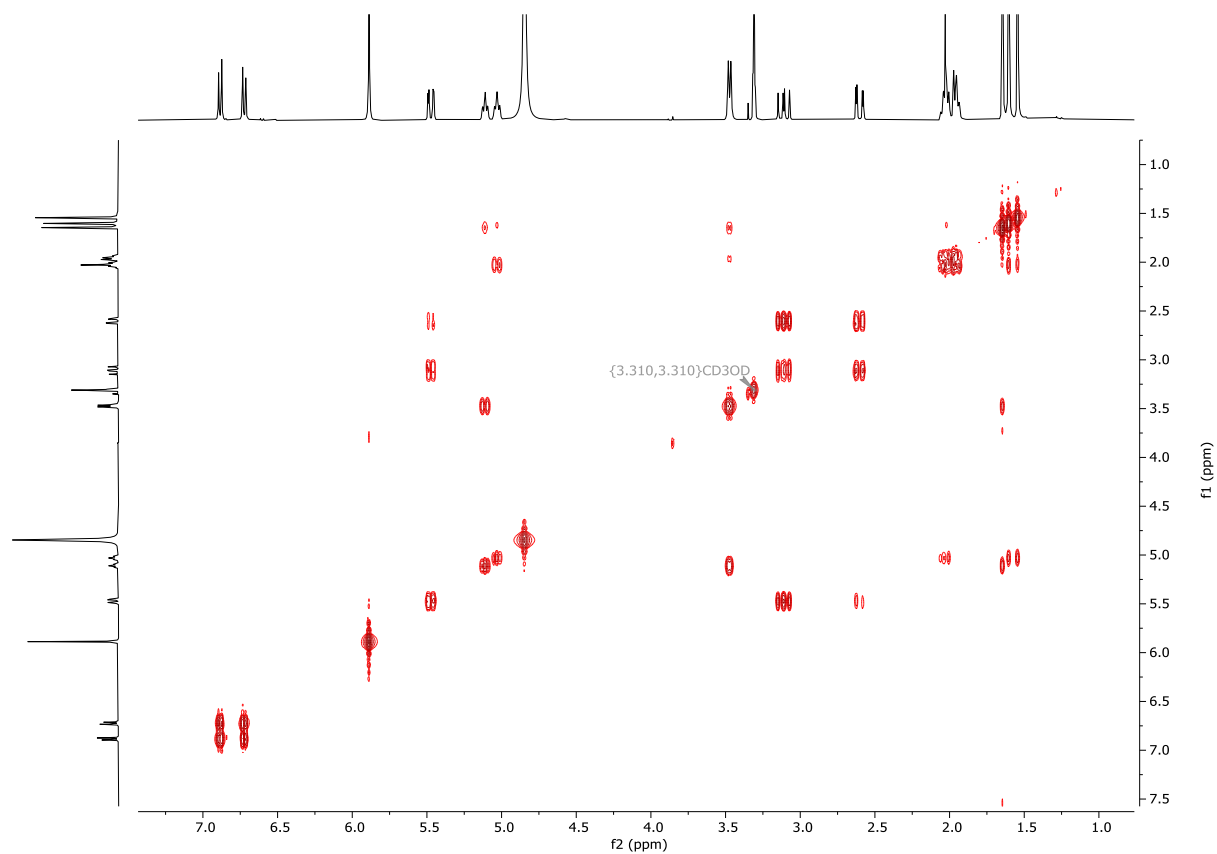

**Figure S5.** HMBC Spectrum of **1** in MeOH- $d_4$ .

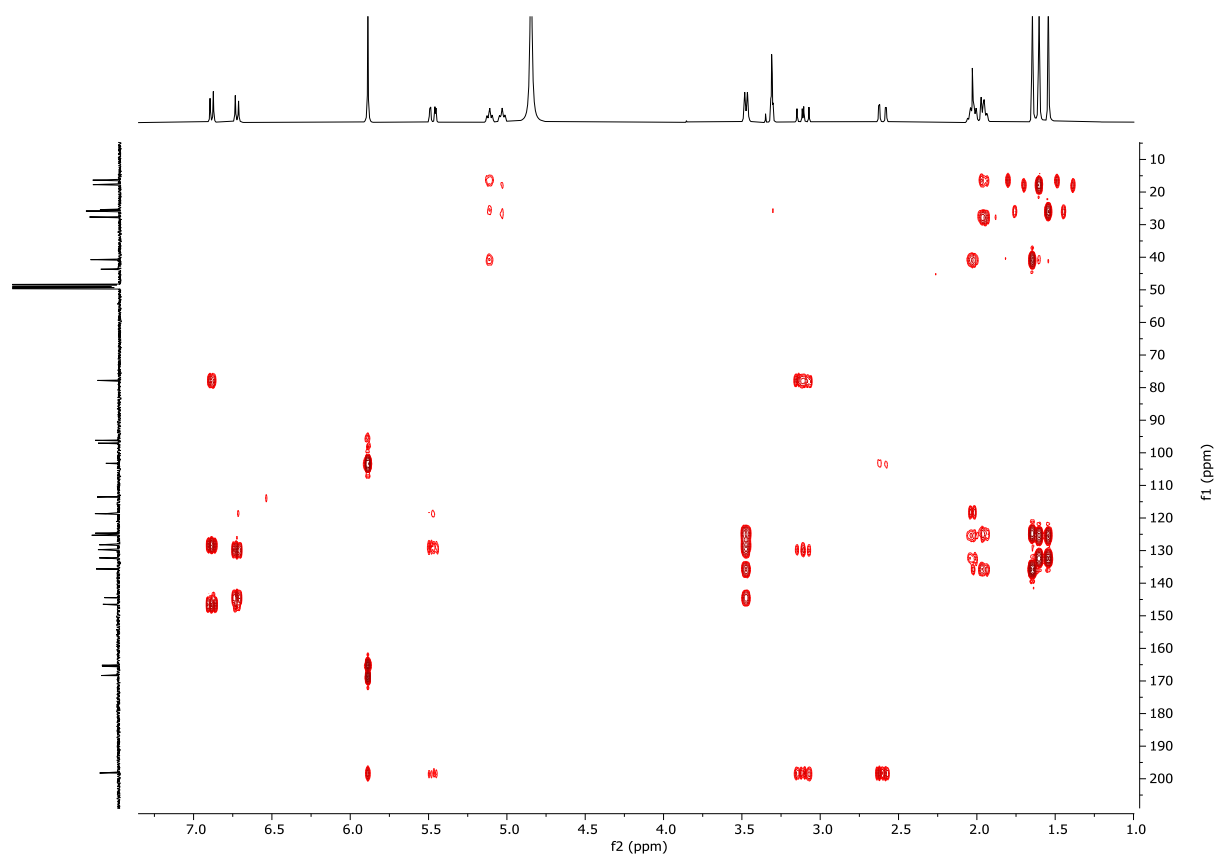

**Figure S6.**  $^1\text{H}$  Spectrum of **2** in MeOH- $d_4$ .

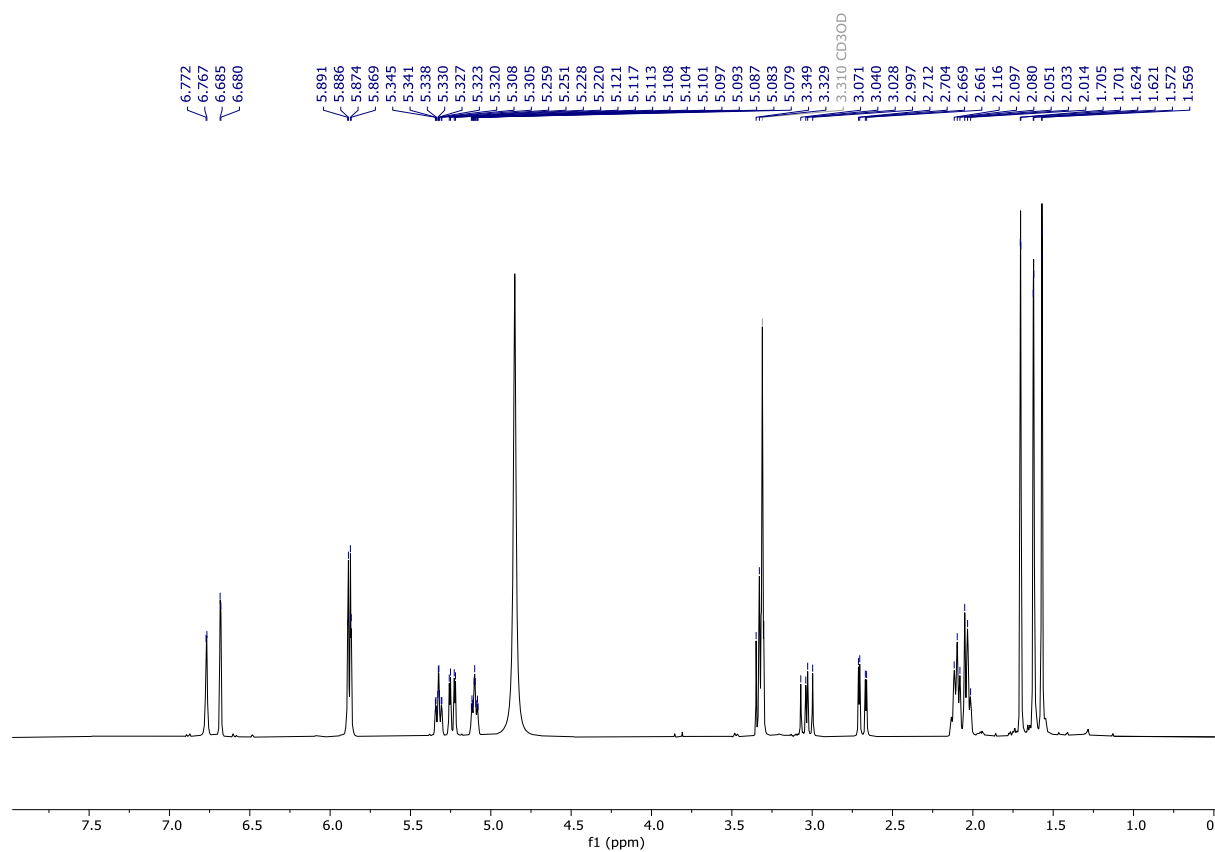

**Figure S7.**  $^{13}\text{C}$  Spectrum of **2** in  $\text{MeOH-}d_4$ .

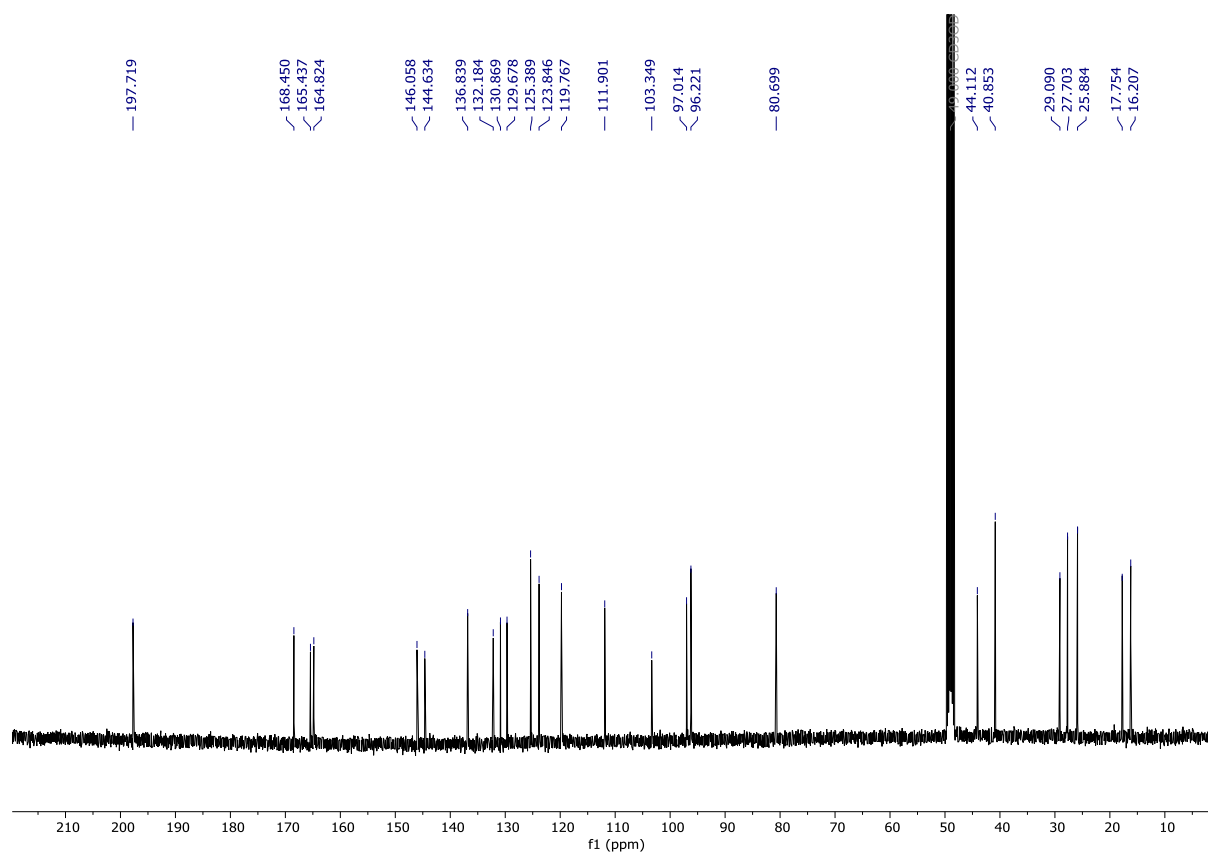

**Figure S8.** HSQC Spectrum of **2** in  $\text{MeOH-}d_4$ .

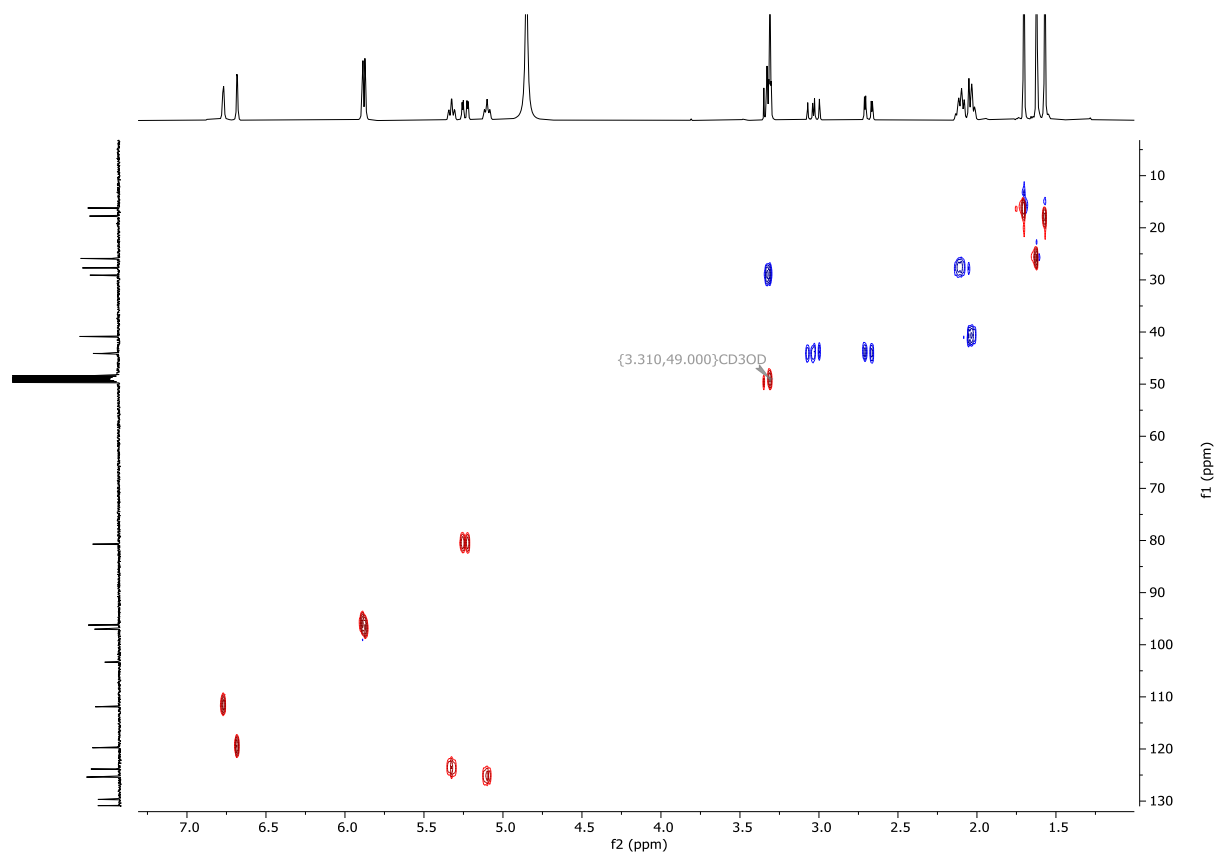

**Figure S9.** gCOSY Spectrum of **2** in MeOH-*d*<sub>4</sub>.

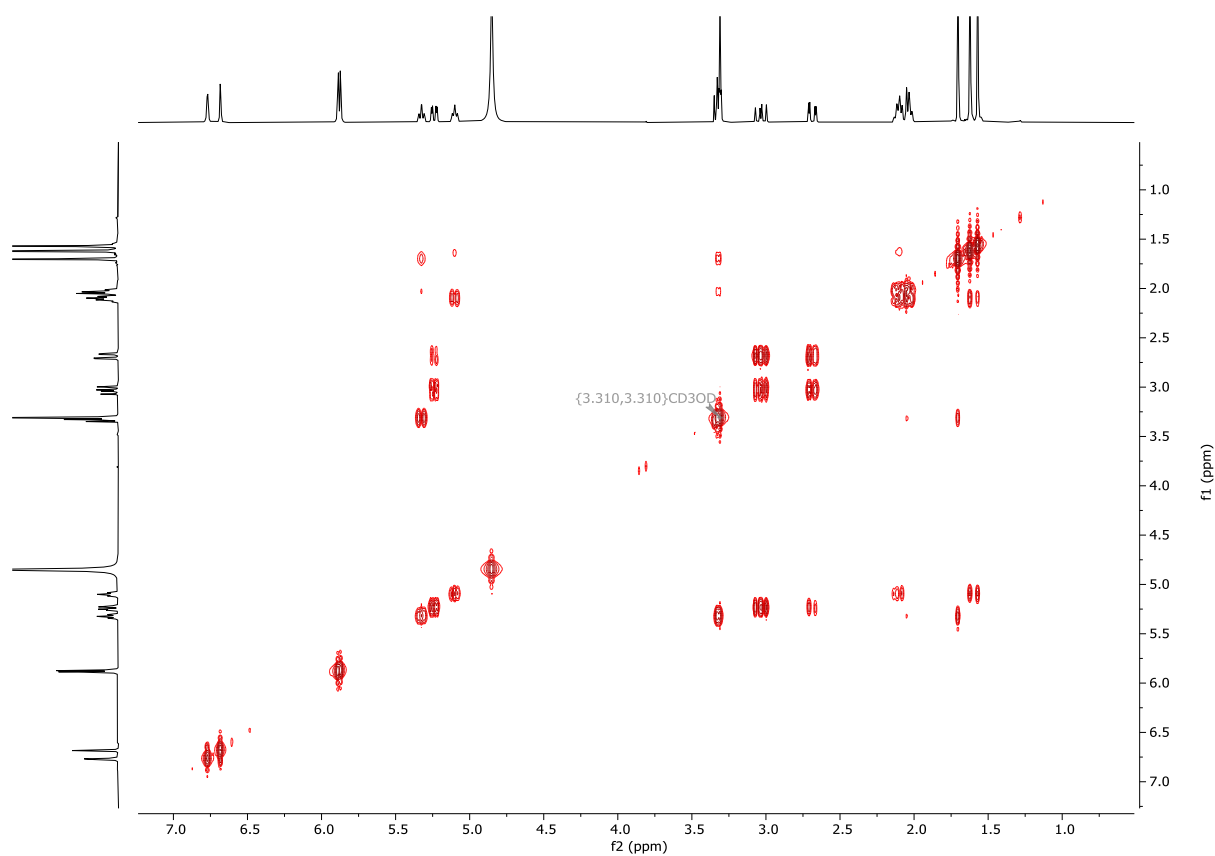

**Figure S10.** HMBC Spectrum of **2** in MeOH-*d*<sub>4</sub>.

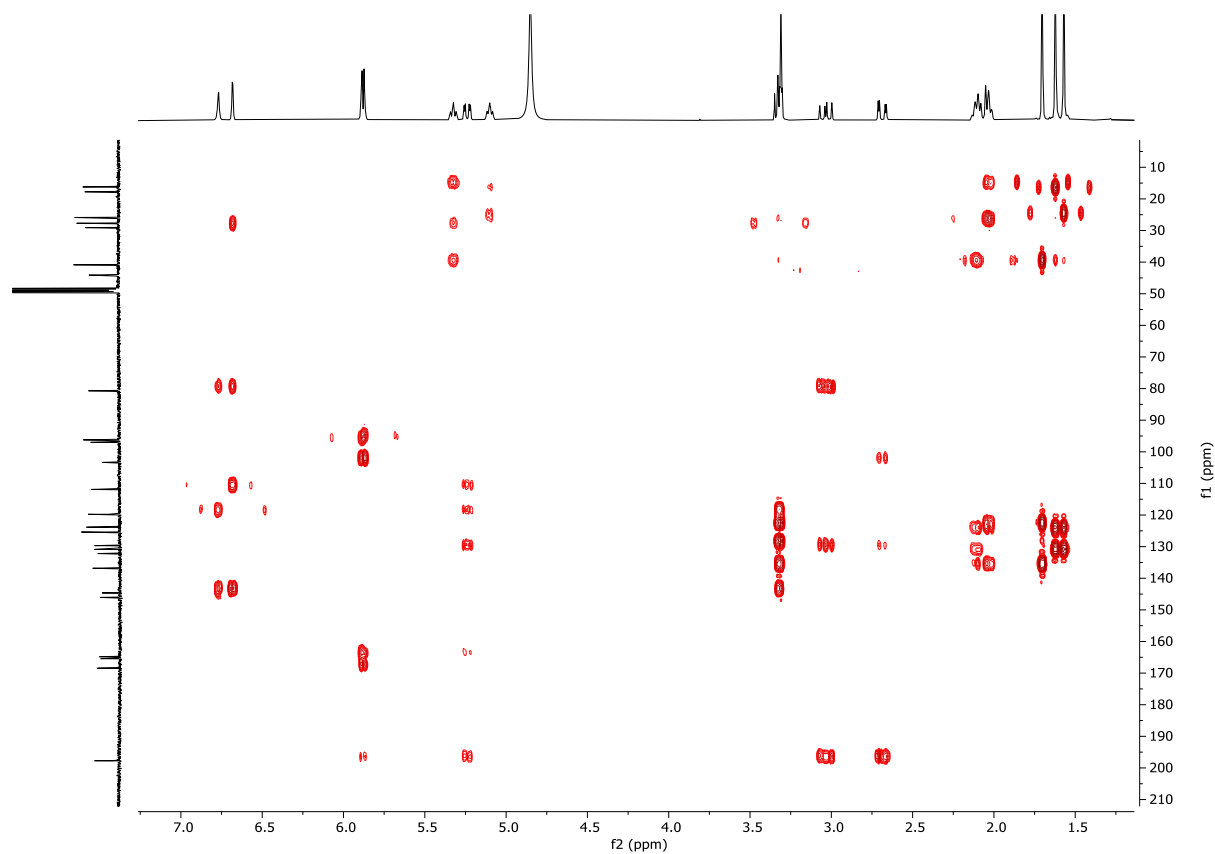

**Figure S11.**  $^1\text{H}$  Spectrum of **3** in  $\text{MeOH-}d_4$ .

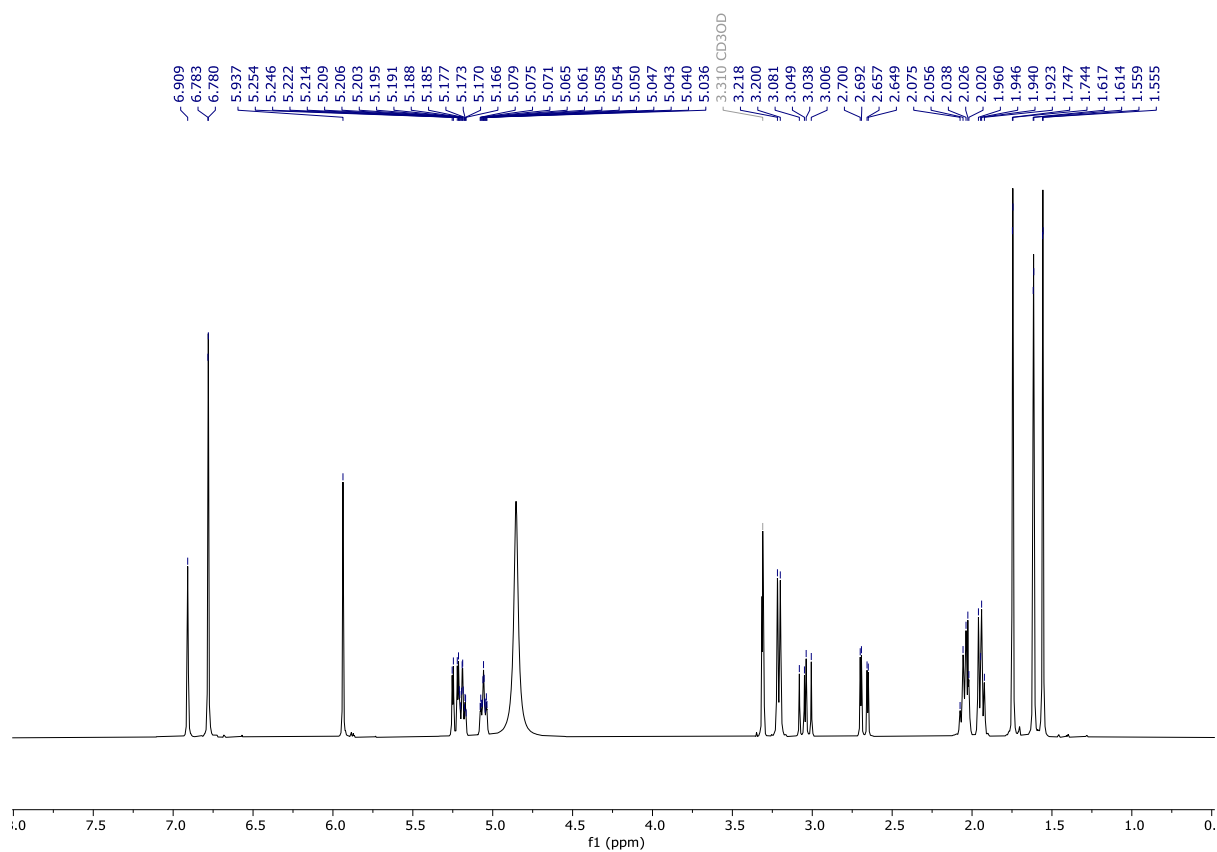

**Figure S12.**  $^{13}\text{C}$  Spectrum of **3** in  $\text{MeOH-}d_4$ .

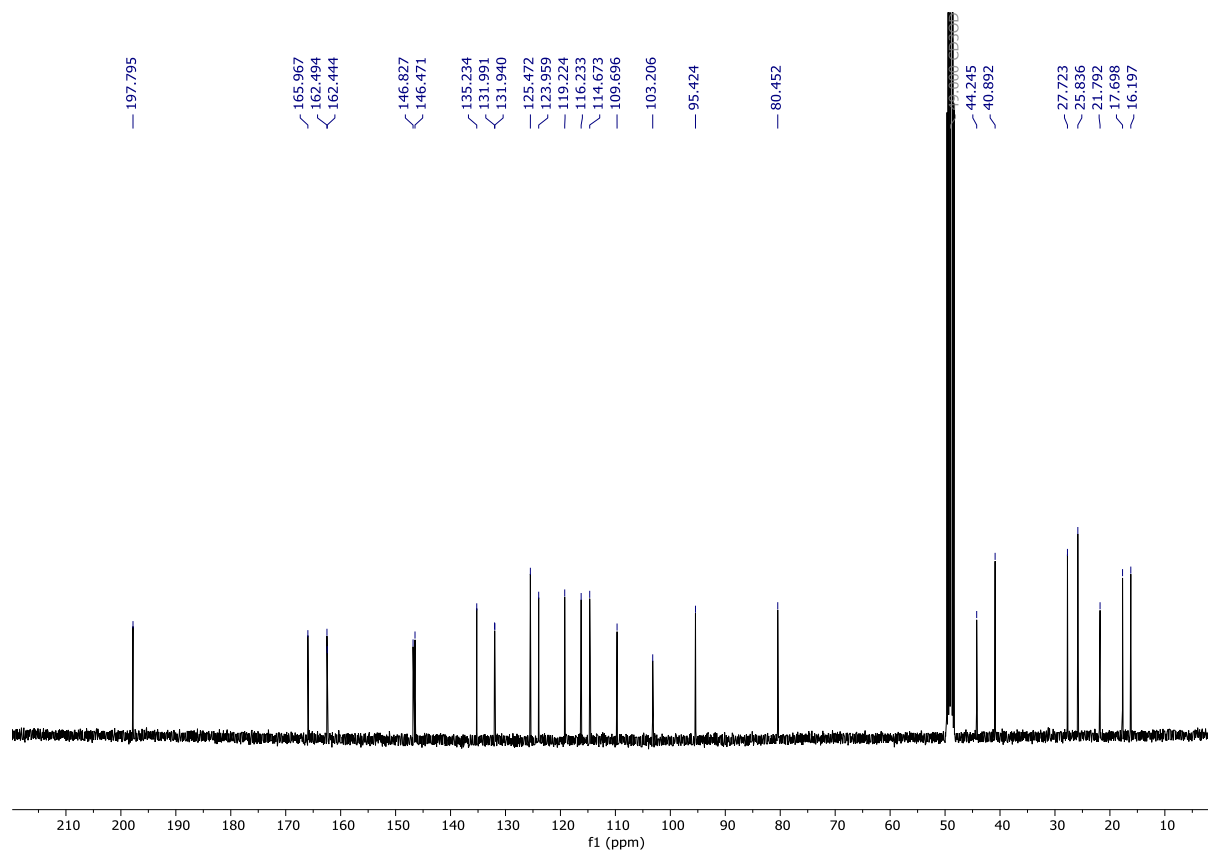



**Figure S13.** HSQC Spectrum of **3** in MeOH-*d*<sub>4</sub>.

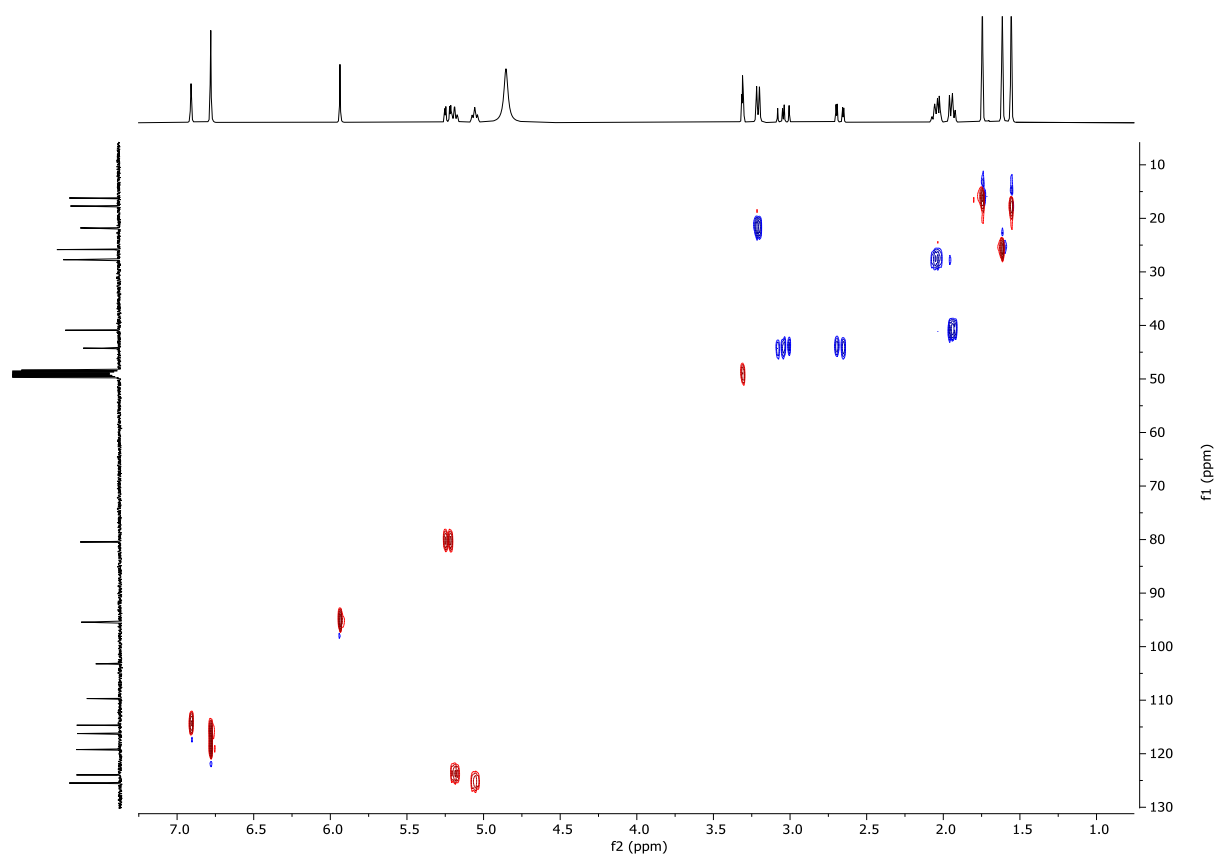

**Figure S14.** gCOSY Spectrum of **3** in MeOH-*d*<sub>4</sub>.

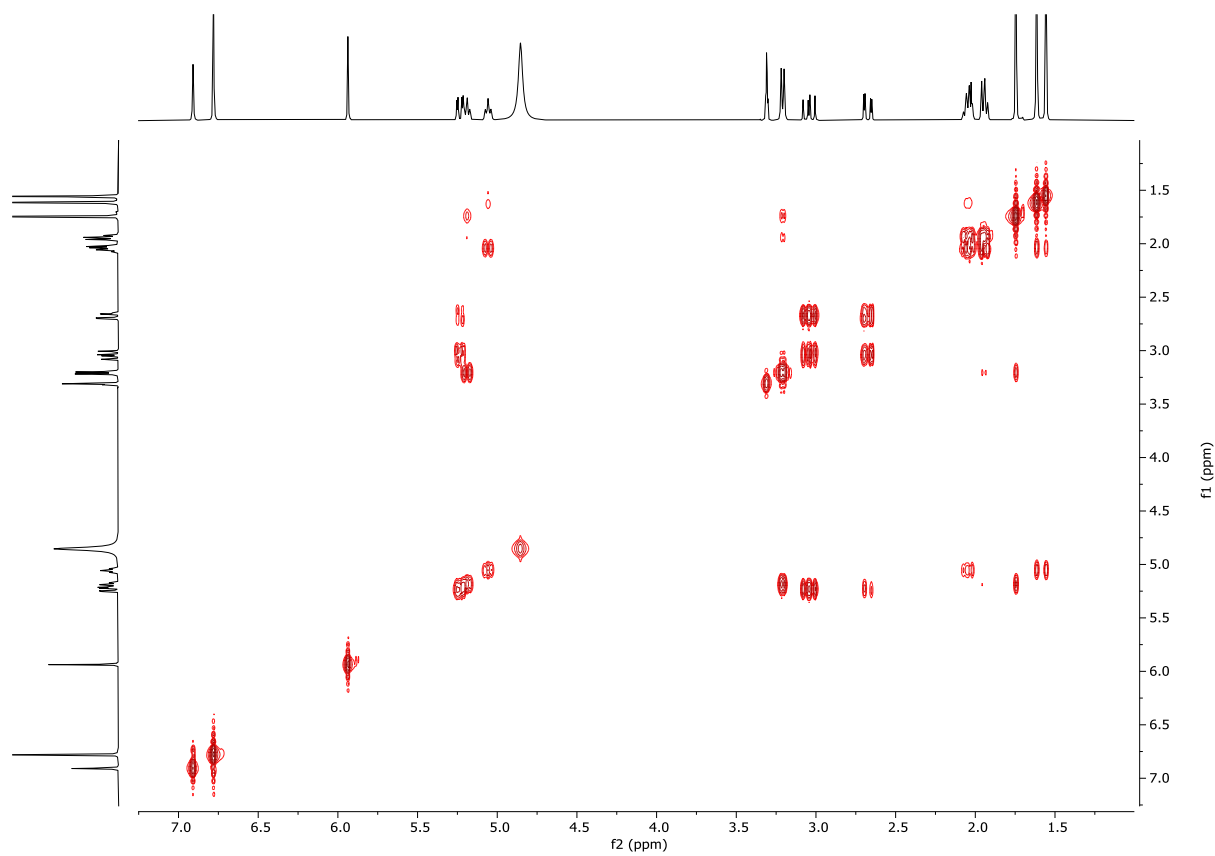

**Figure S15.** HMBC Spectrum of **3** in MeOH- $d_4$ .

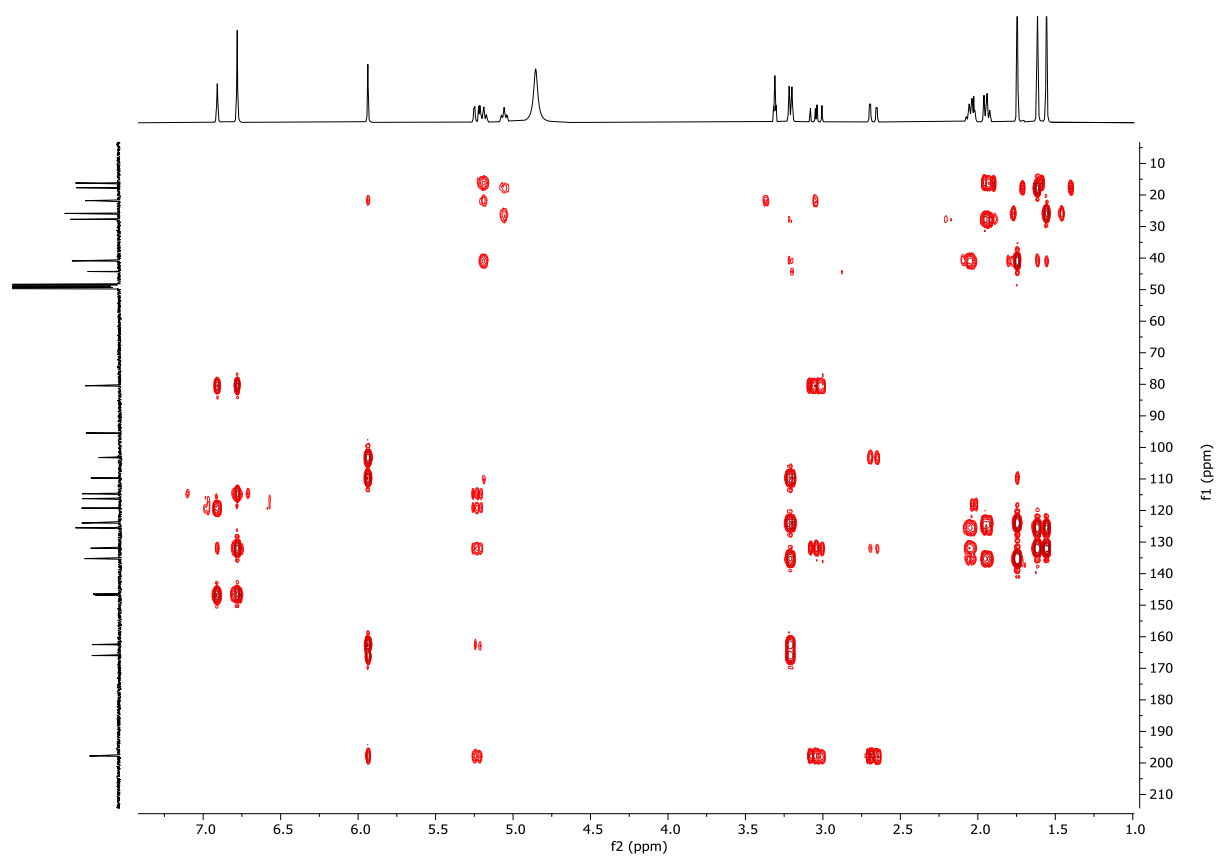

**Figure S16.**  $^1\text{H}$  Spectrum of **4** in MeOH- $d_4$ .

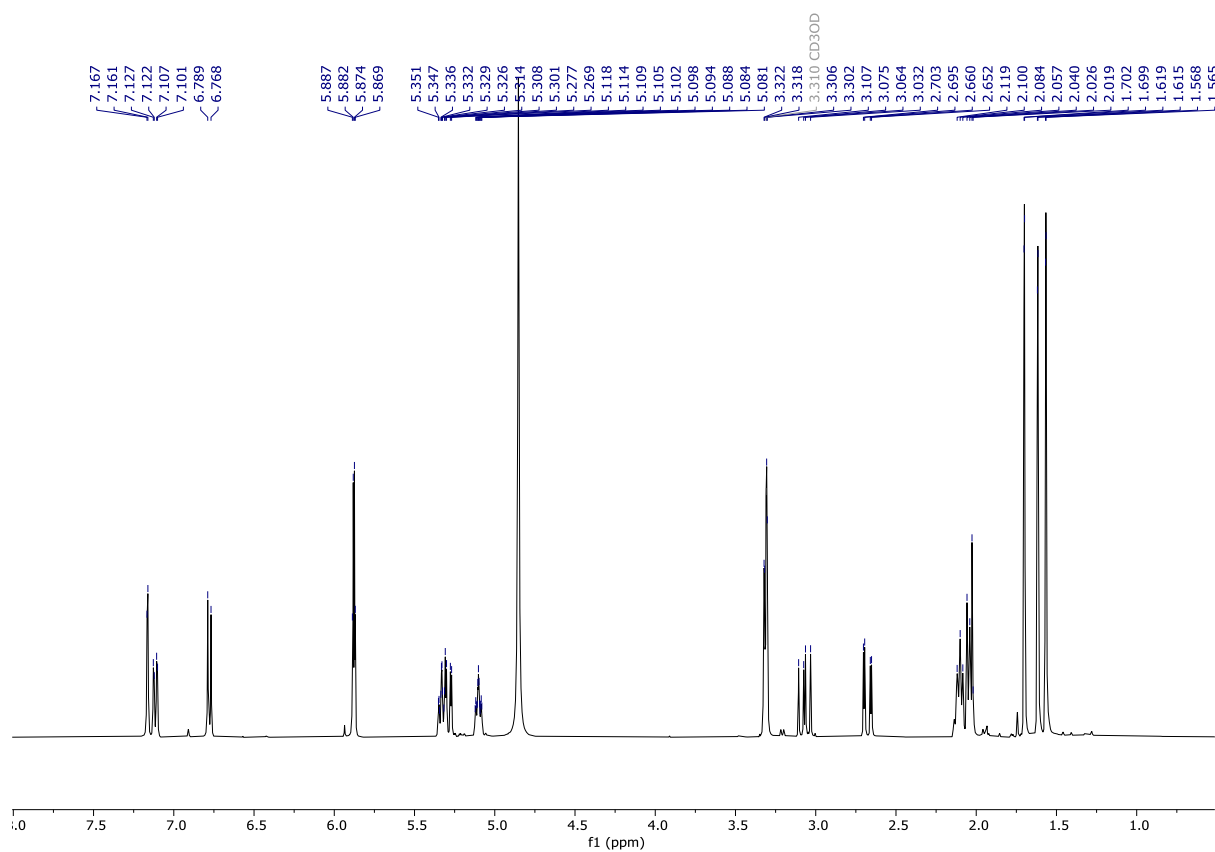

**Figure S17.**  $^{13}\text{C}$  Spectrum of **4** in  $\text{MeOH-}d_4$ .

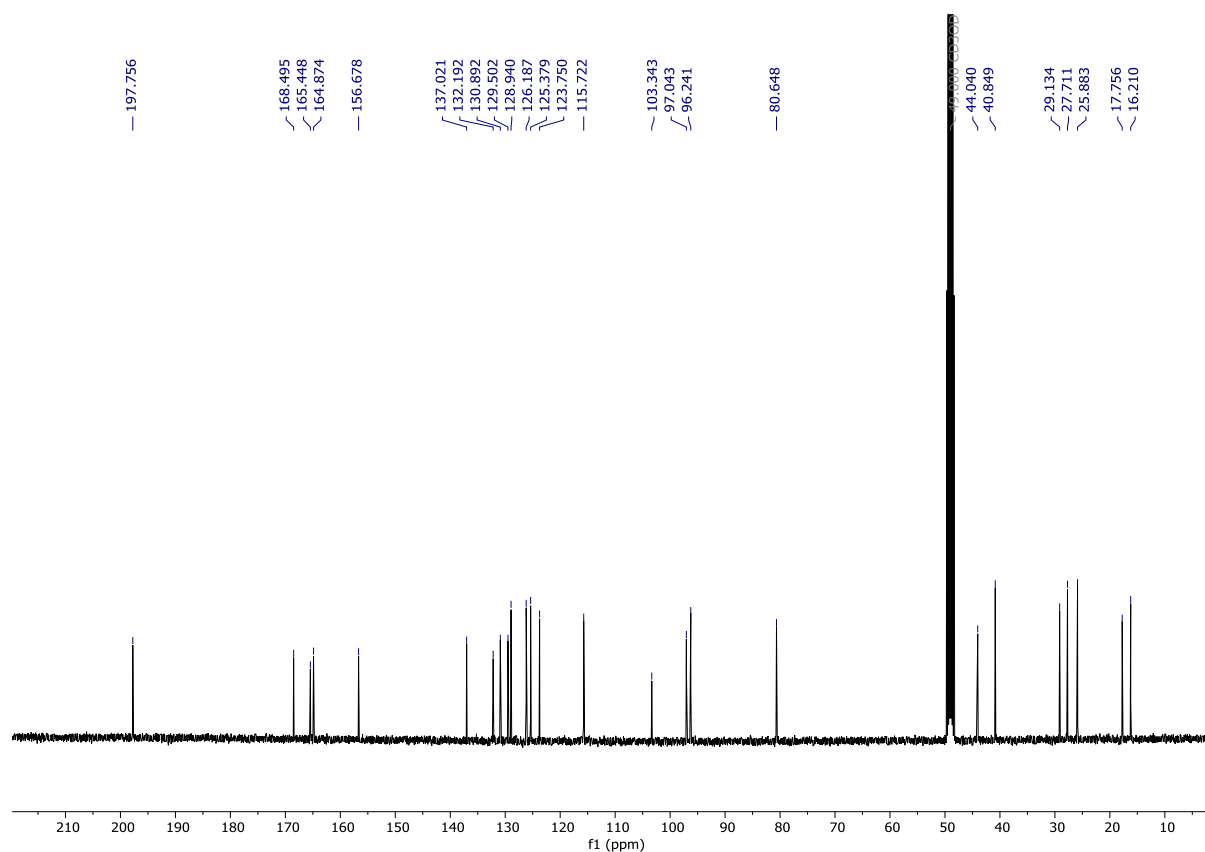

**Figure S18.** HSQC Spectrum of **4** in  $\text{MeOH-}d_4$ .

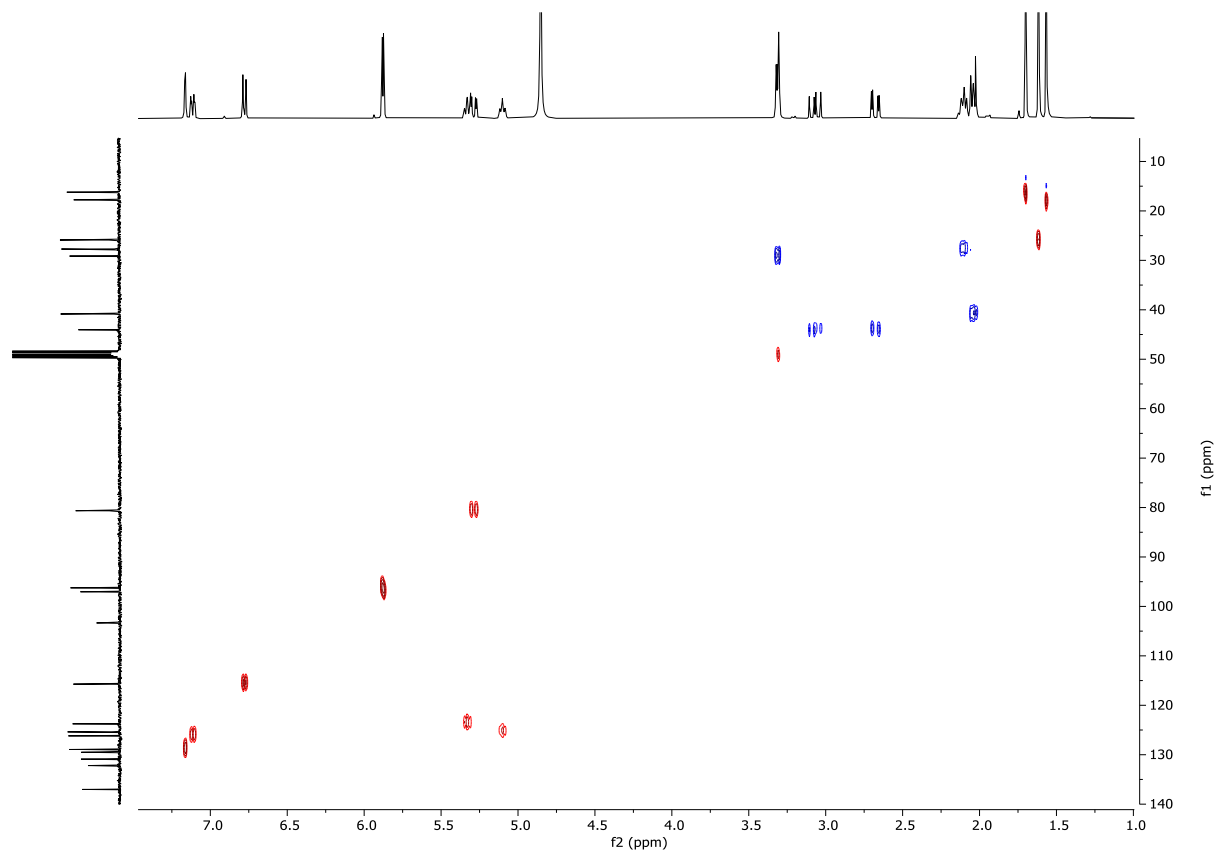

**Figure S19.** gCOSY Spectrum of **4** in MeOH-*d*<sub>4</sub>.

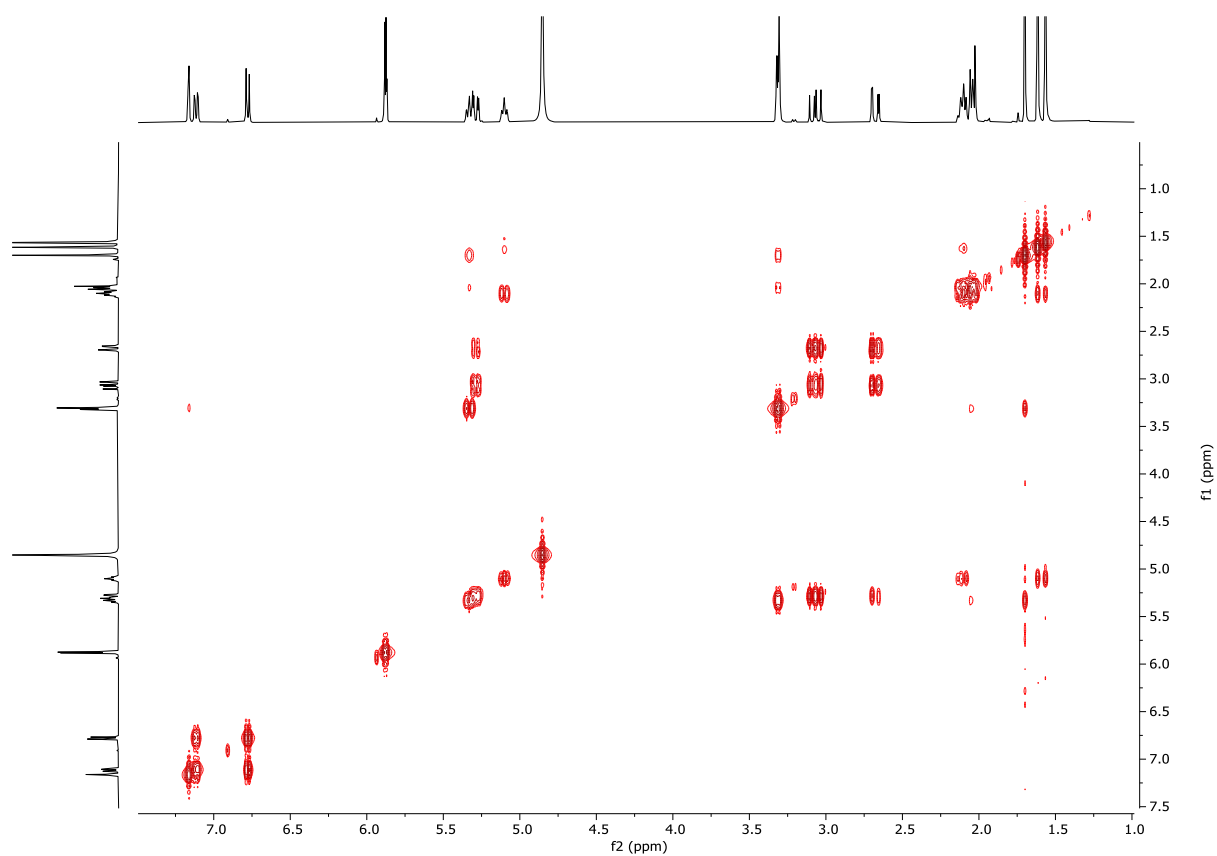

**Figure S20.** HMBC Spectrum of **4** in MeOH-*d*<sub>4</sub>.

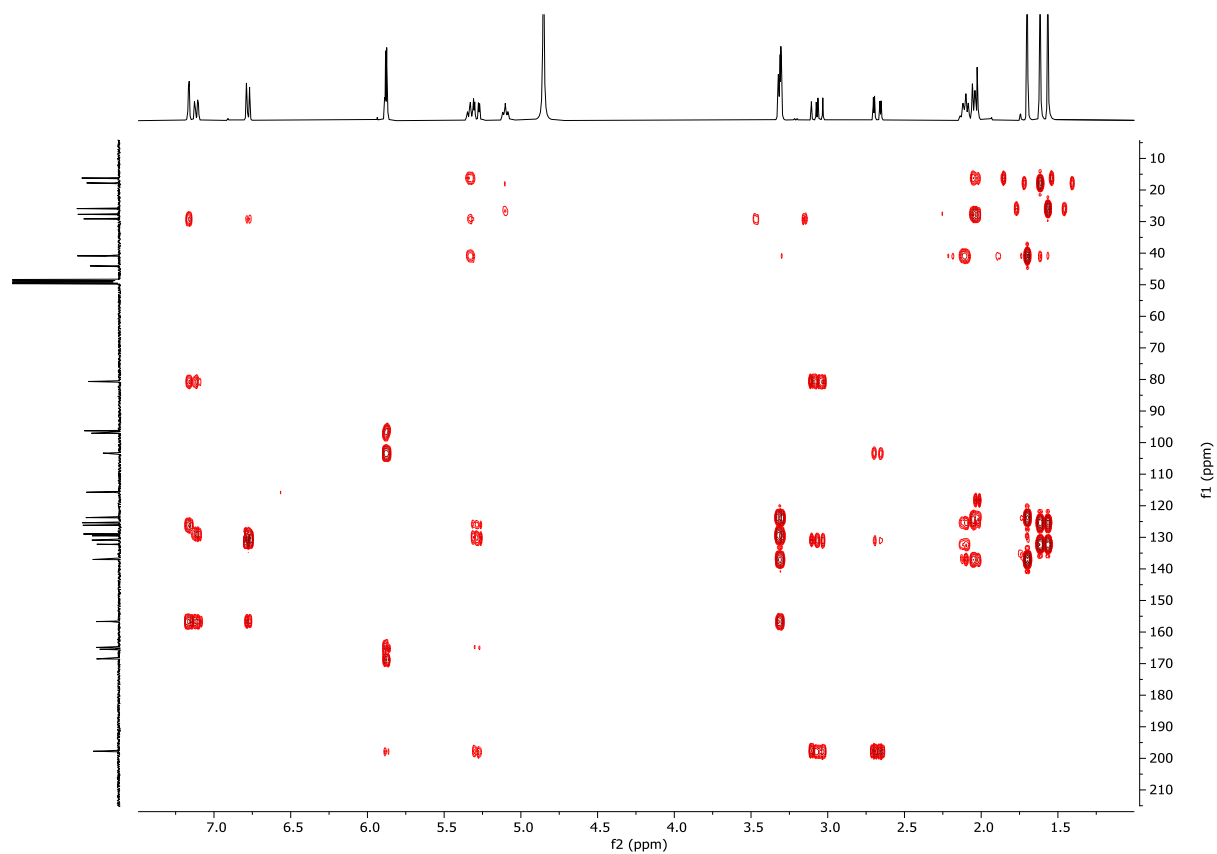

**Figure S21.**  $^1\text{H}$  Spectrum of **5** in  $\text{CHCl}_3-d$ .

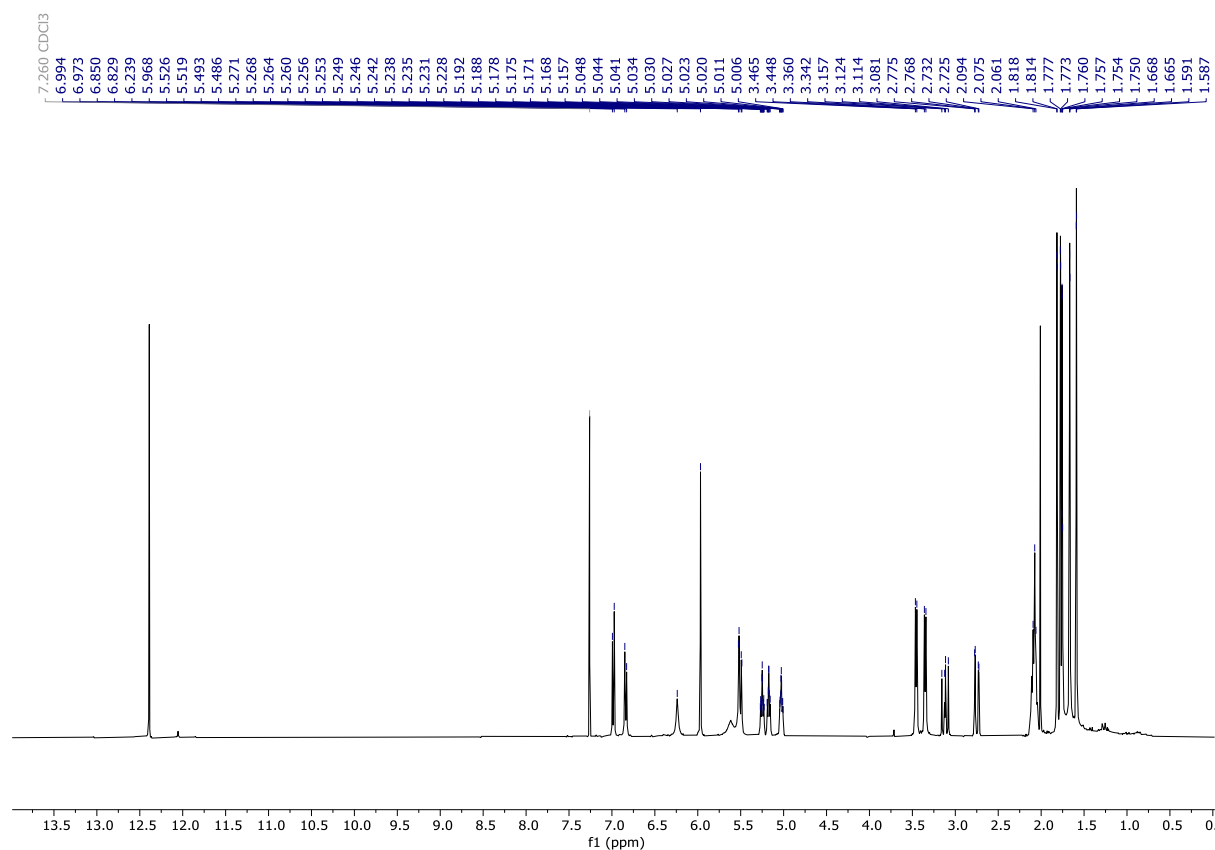

**Figure S22.**  $^{13}\text{C}$  Spectrum of **5** in  $\text{CHCl}_3-d$ .

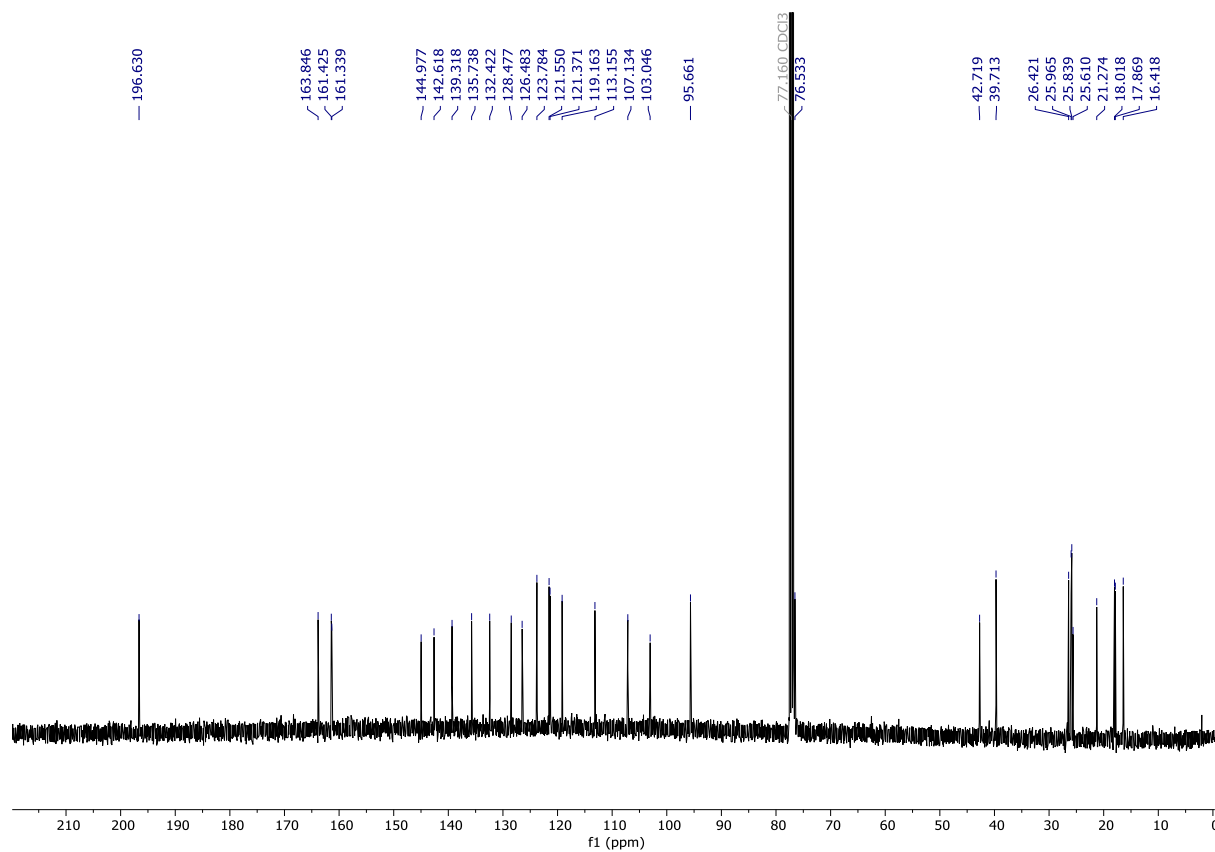

**Figure S23.** HSQC Spectrum of **5** in  $\text{CHCl}_3-d$ .

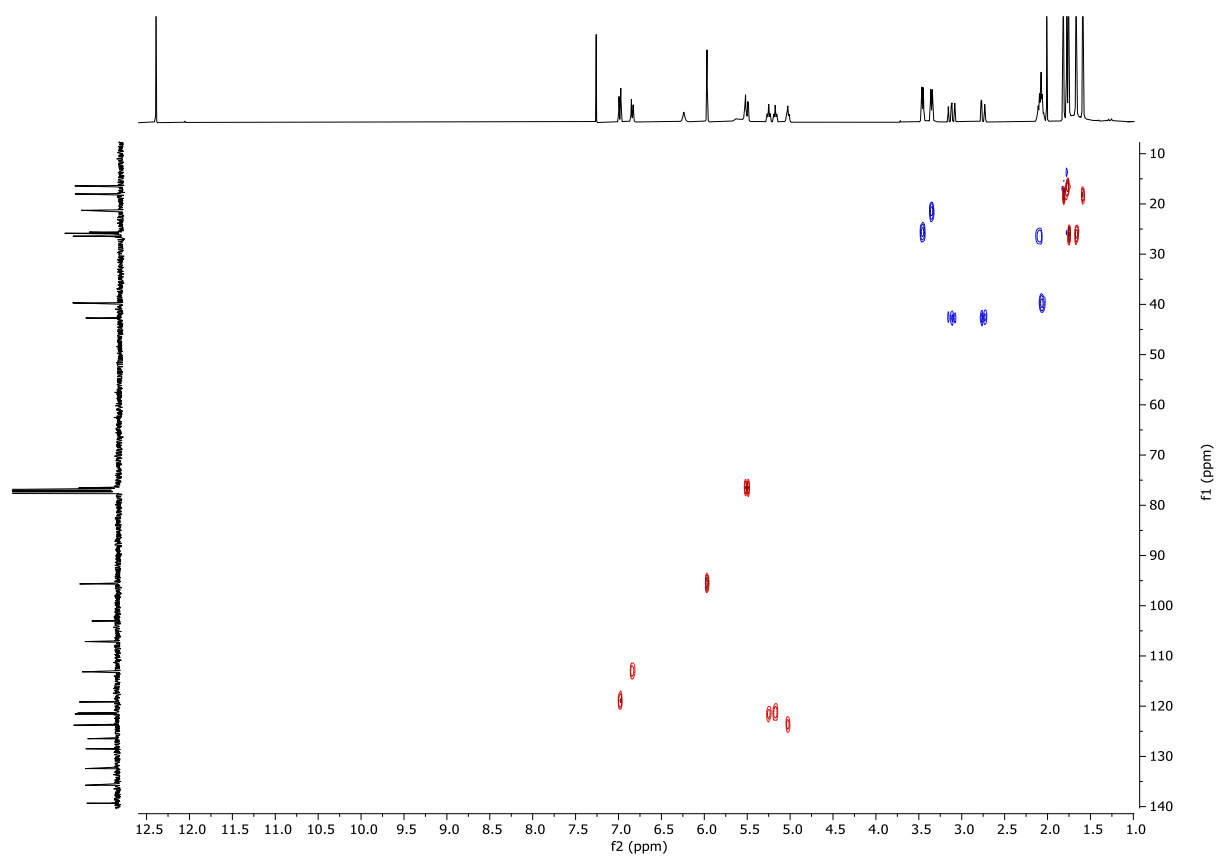

**Figure S24.** gCOSY Spectrum of **5** in  $\text{CHCl}_3-d$ .

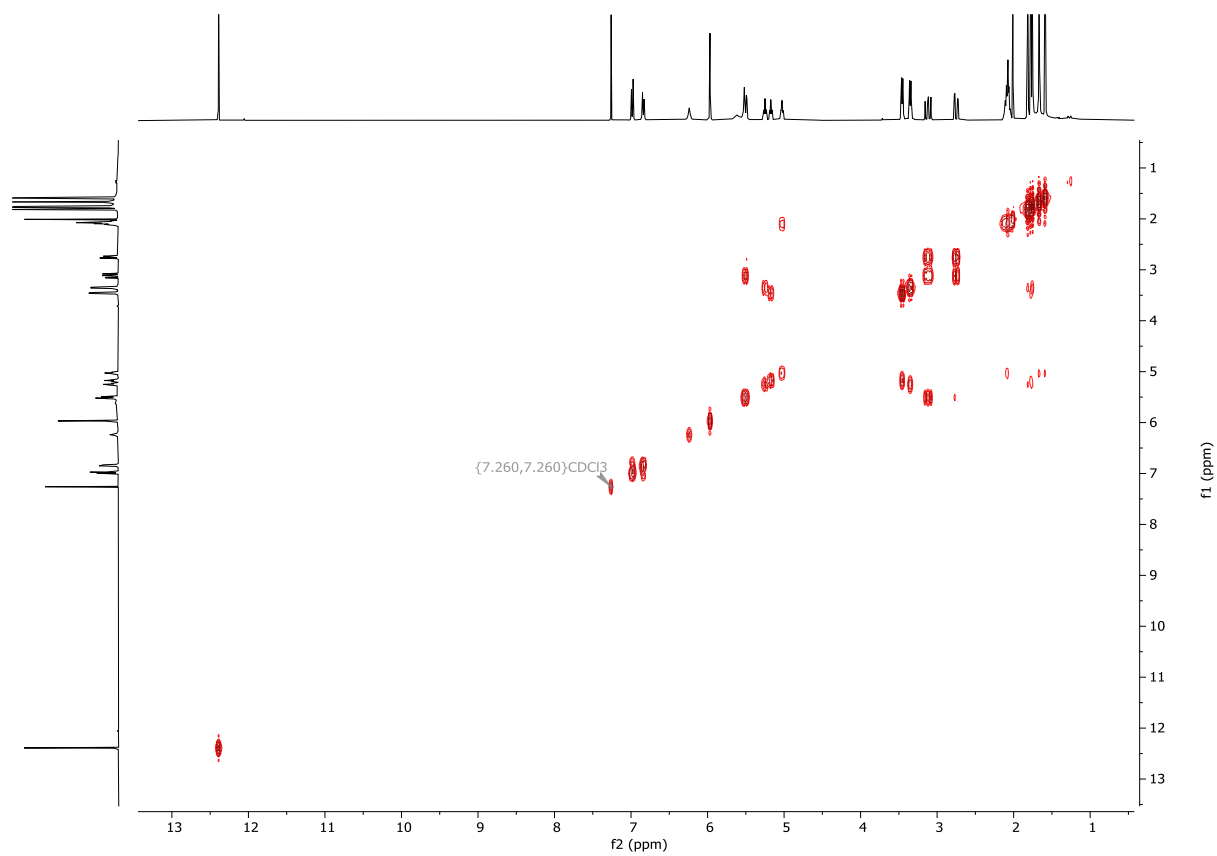

**Figure S25.** HMBC Spectrum of **5** in  $\text{CHCl}_3\text{-}d$ .

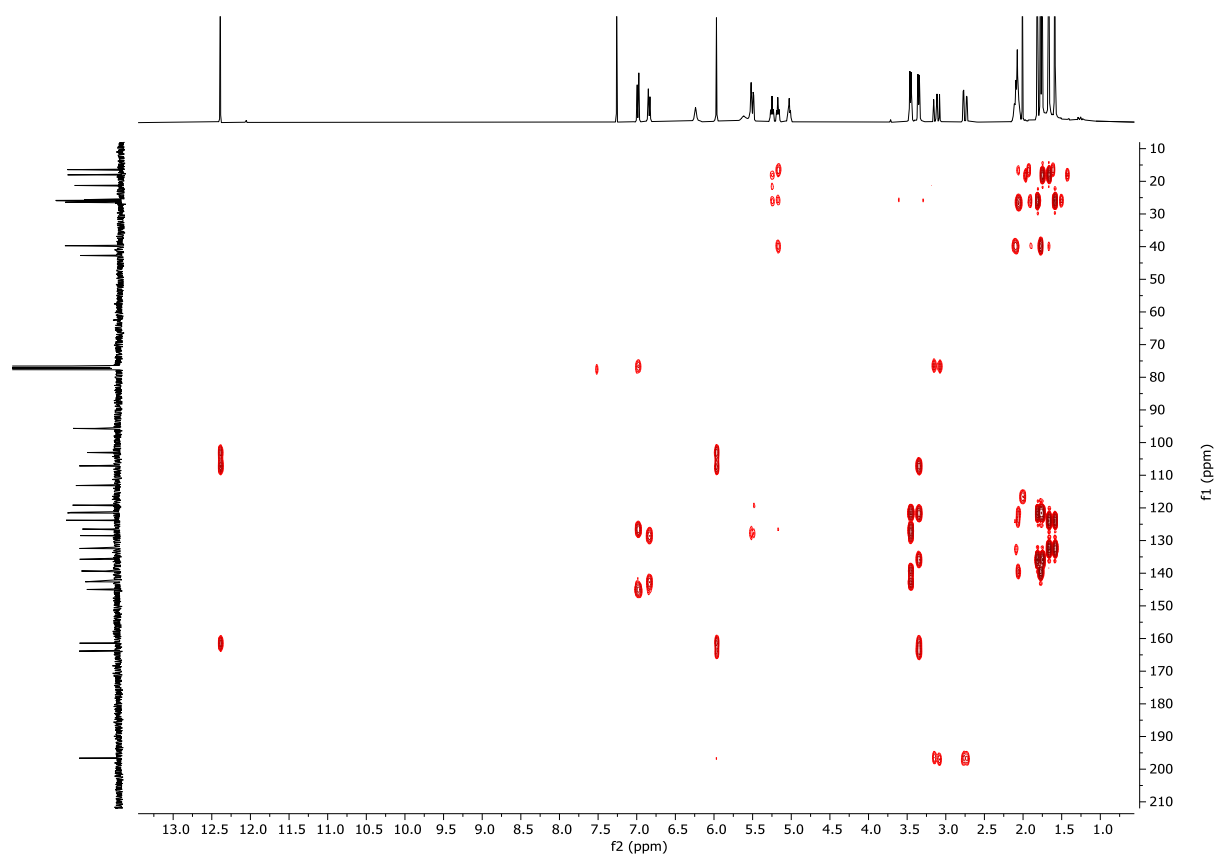

**Figure S26.**  $^1\text{H}$  Spectrum of **6** in  $\text{MeOH-}d_4$ .

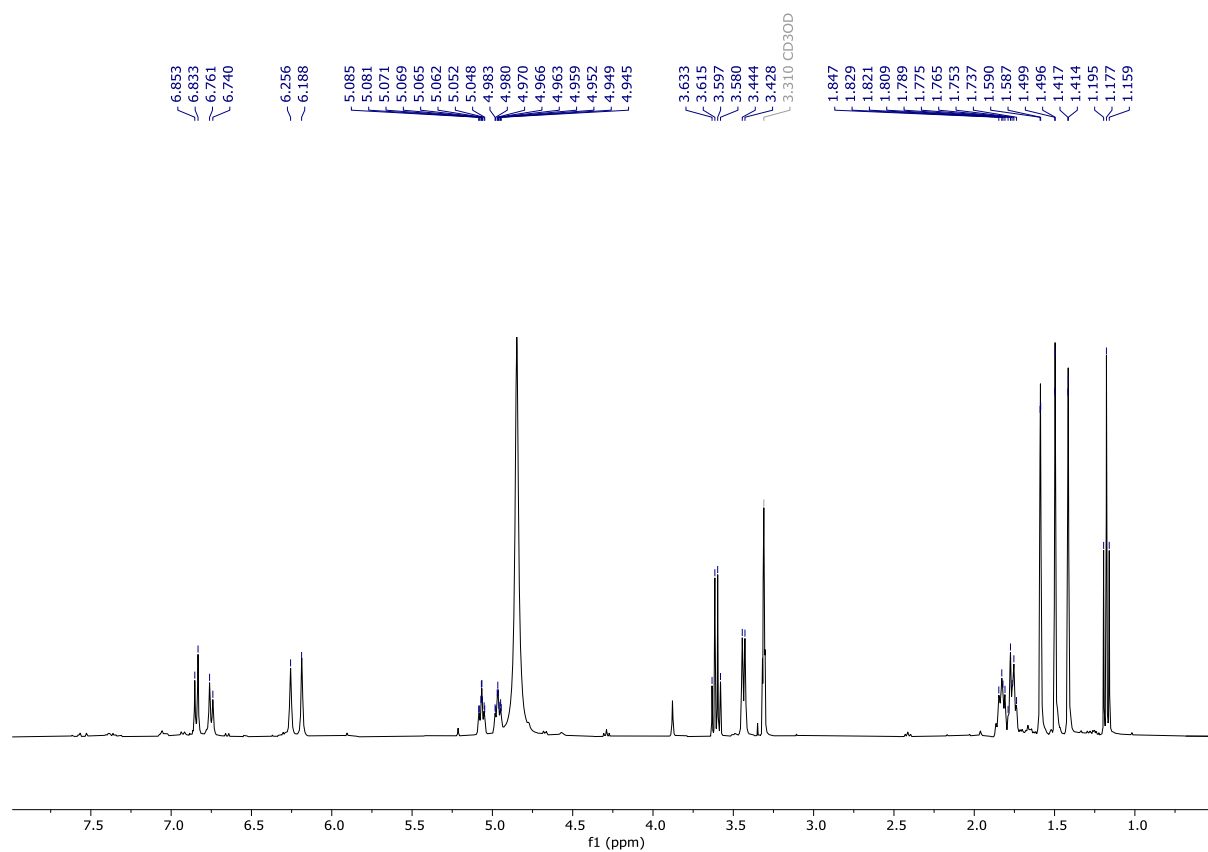

**Figure S27.**  $^{13}\text{C}$  Spectrum of **6** in  $\text{MeOH-}d_4$ .

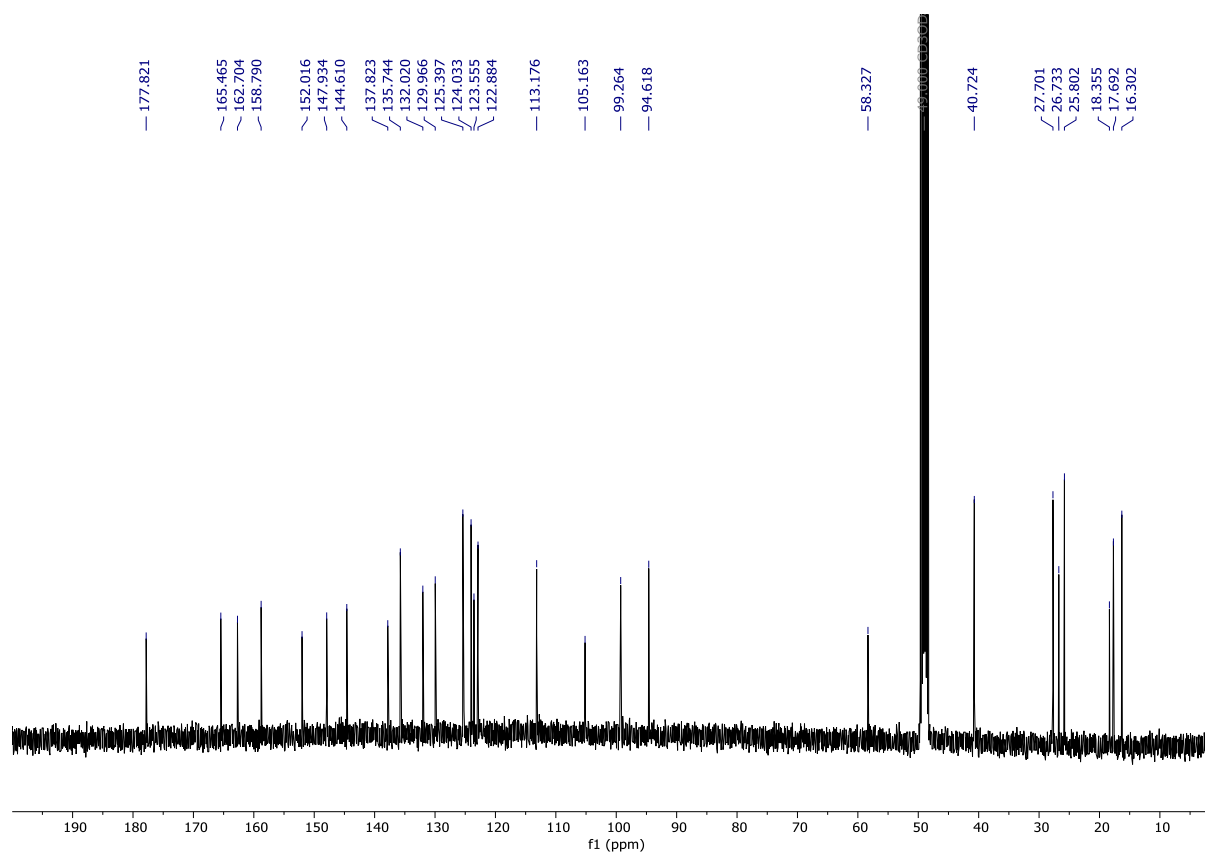

**Figure S28.** HSQC Spectrum of **6** in  $\text{MeOH-}d_4$ .

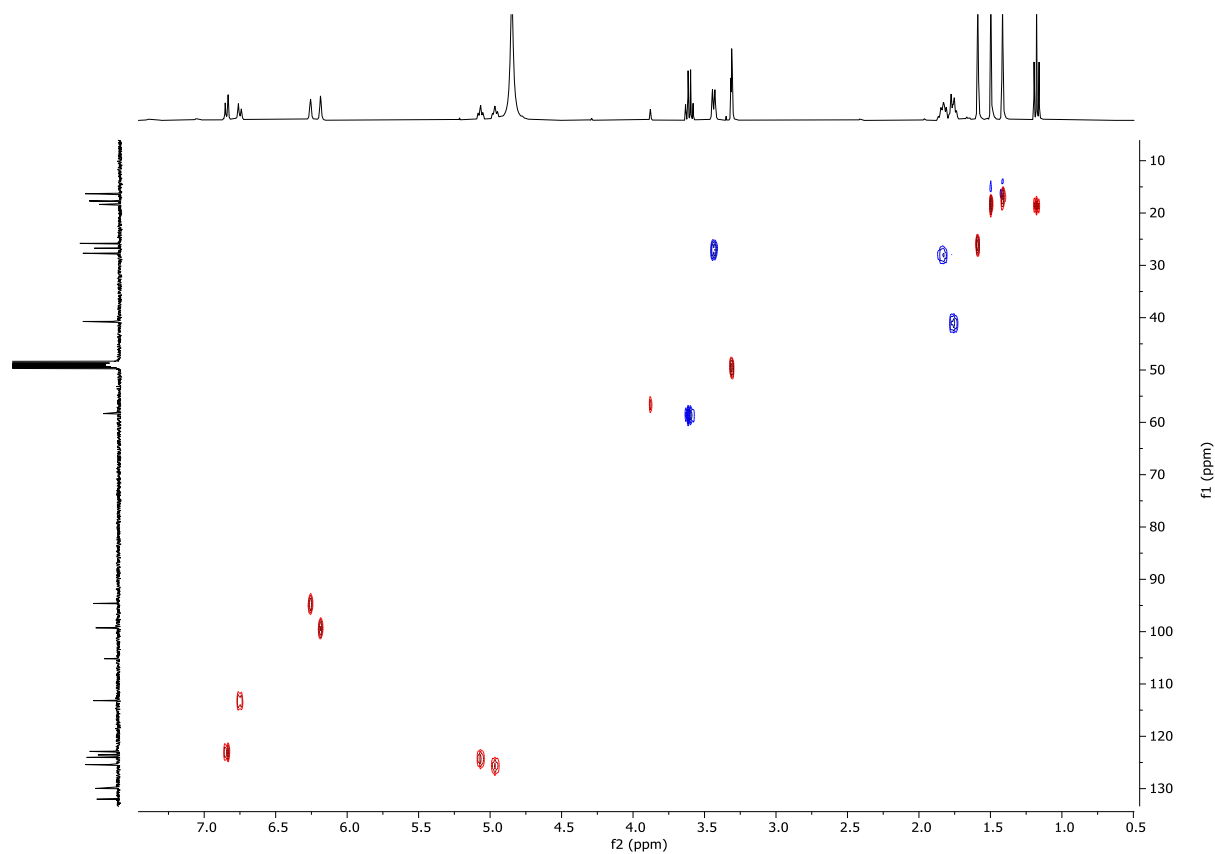



**Figure S29.** gCOSY Spectrum of **6** in MeOH- $d_4$ .

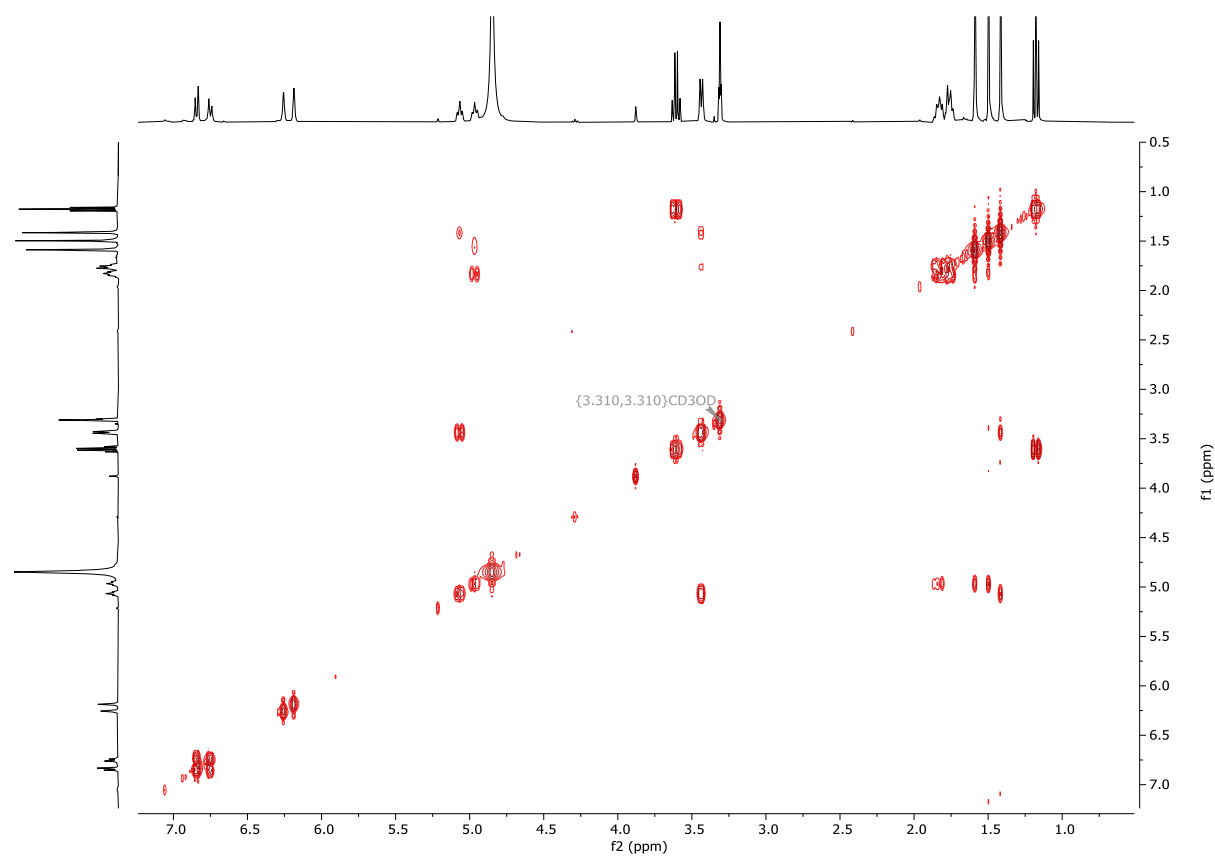

**Figure S30.** HMBC Spectrum of **6** in MeOH- $d_4$ .

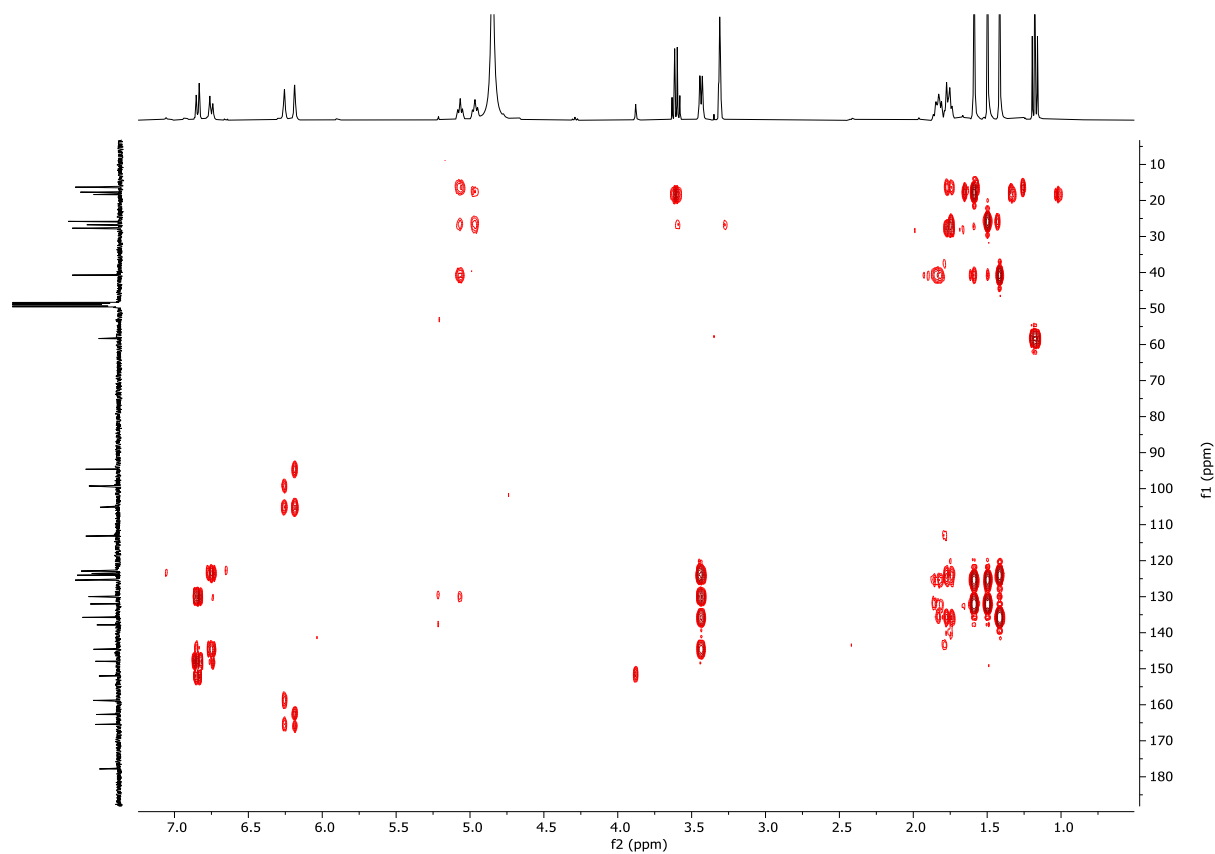

**Figure S31.** Two-dimensional diagrams showing non-covalent interactions of **1-9** and acarbose (**10**) with  $\alpha$ -glucosidase (2ZQ0).

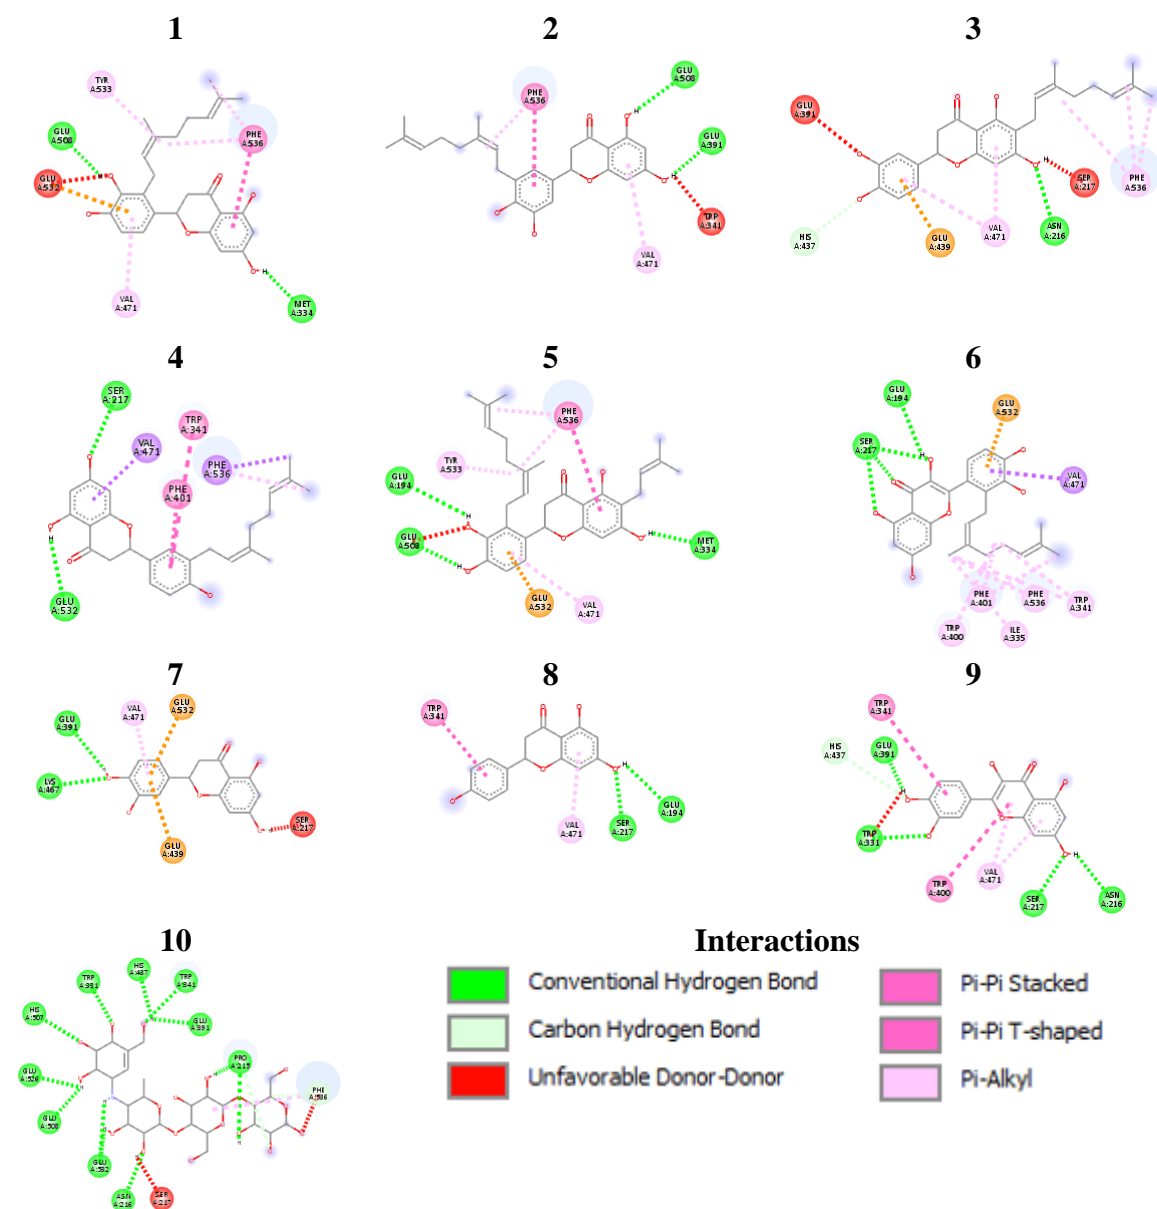

**Figure S32.** Two-dimensional diagrams showing non-covalent interactions of **1-9** and acarbose (**10**) with  $\alpha$ -amylase (2QV4).

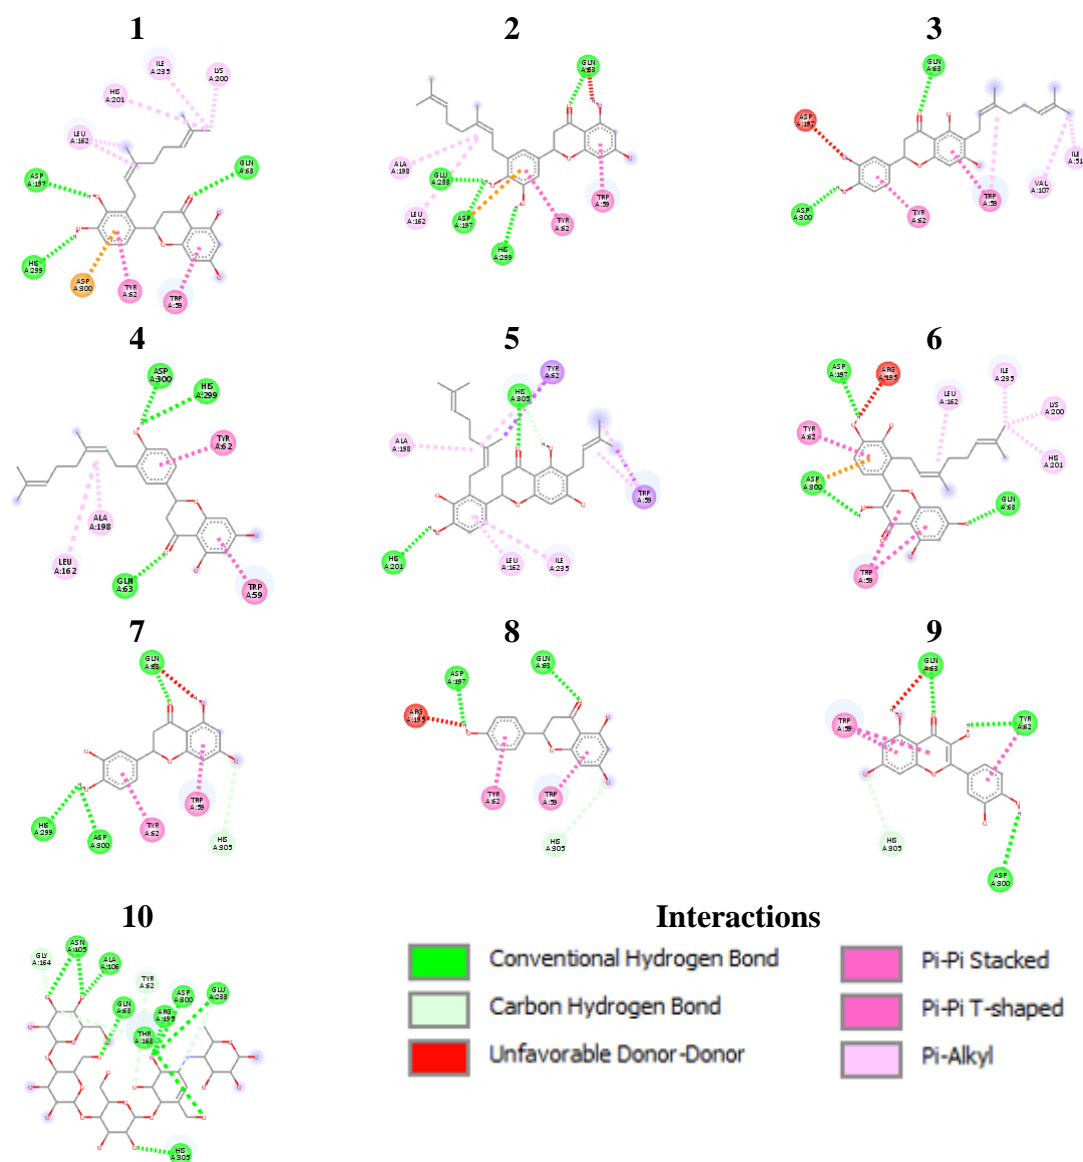

**Figure S33.** Two-dimensional diagrams showing non-covalent interactions of **1-9** and orlistat (**11**) with lipase (6KSM).

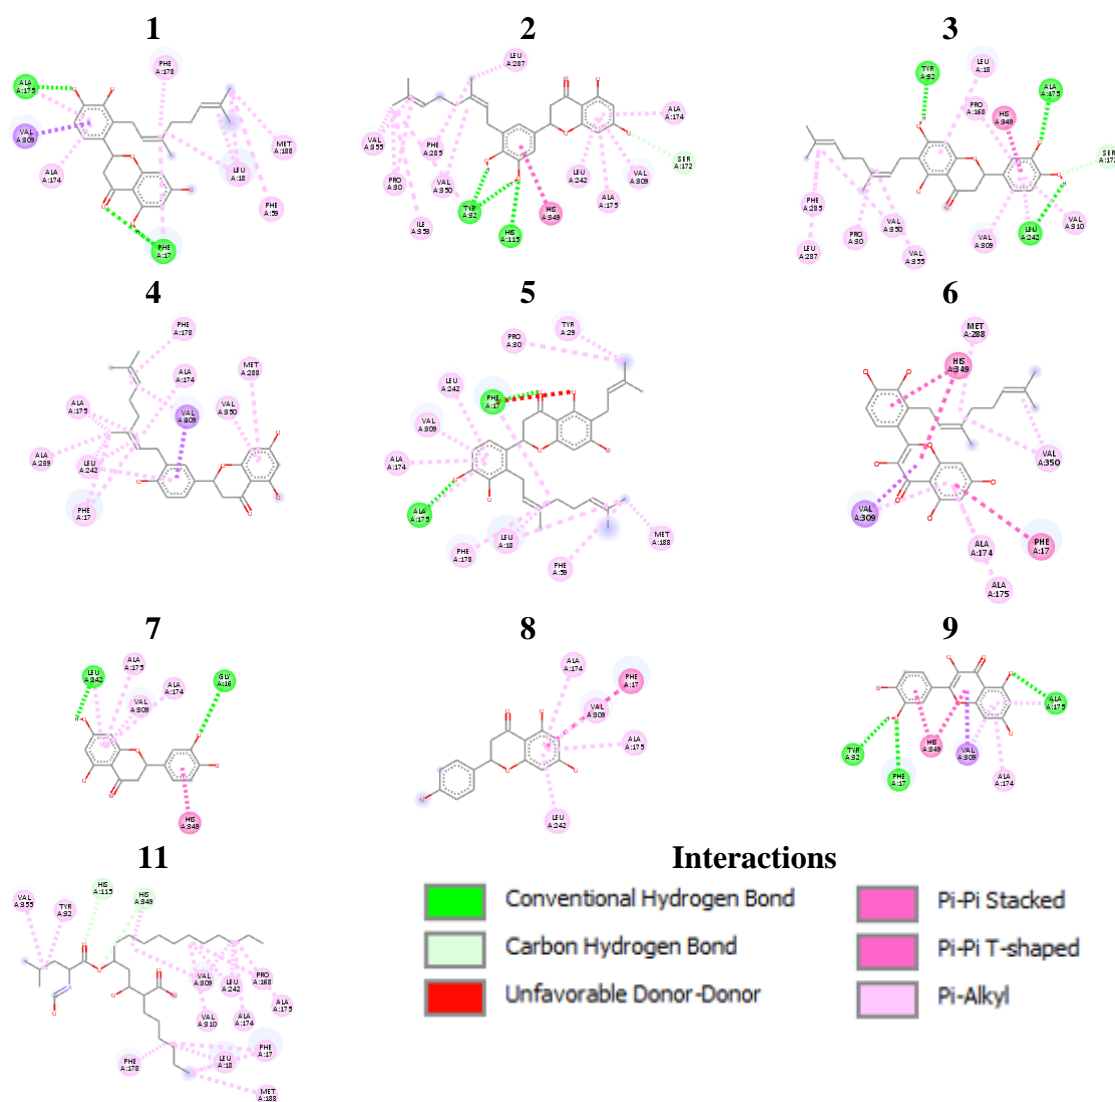

Supplement: s1 [file s1]
